# Supplementary material for: Transcriptome Analysis Reveals the Differentially Expressed Genes Associated with Growth in Guangxi Partridge Chickens
Source: MDPI journal article supplement (doi:10.3390/genes13050798), 2022-04-29
Supplement: s1 [file s1]

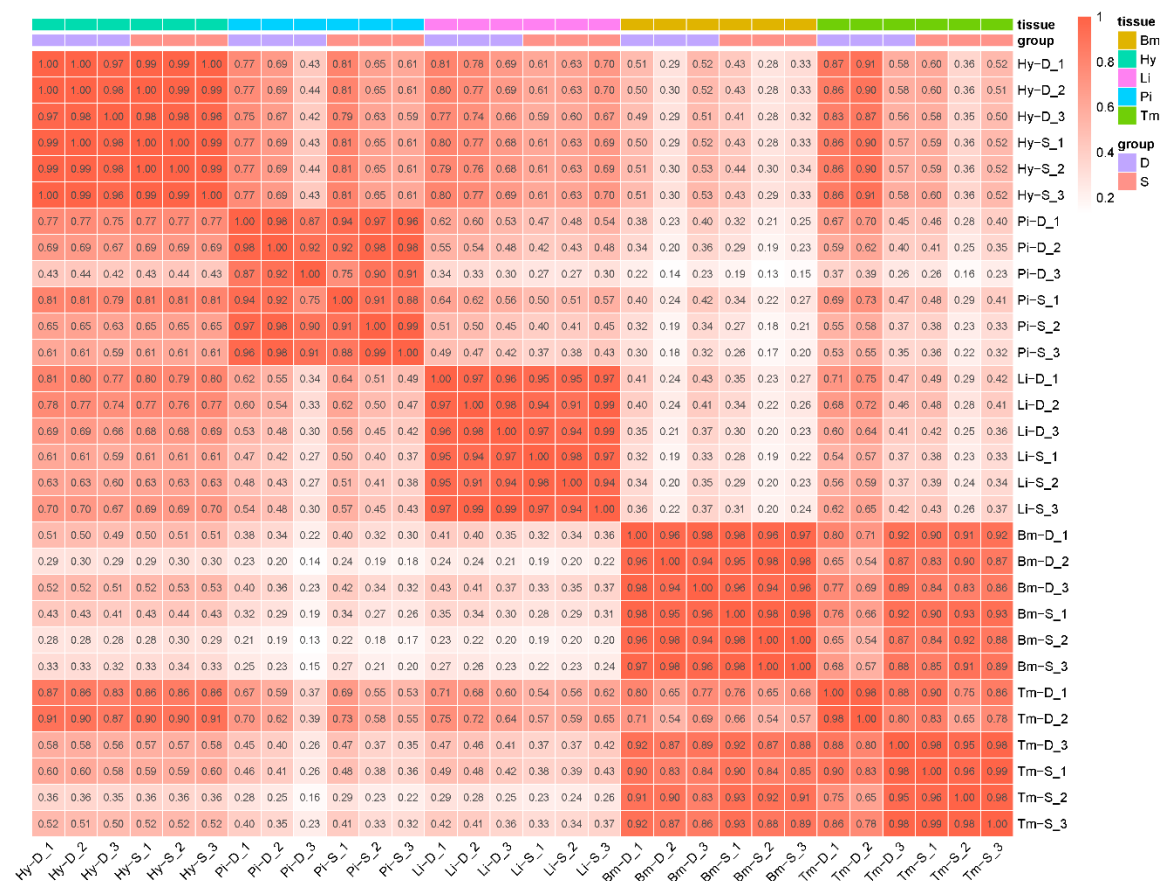

**Figure S1.** The heatmap of correlations between all tissues.

The abscissa and ordinate in the figure are all samples, and the color depth represents the correlation coefficient of the two samples. Hy, Hypothalamus; Pi, Pituitary; Bm, Breast muscle; Tm, Thigh muscle; Li, Liver.

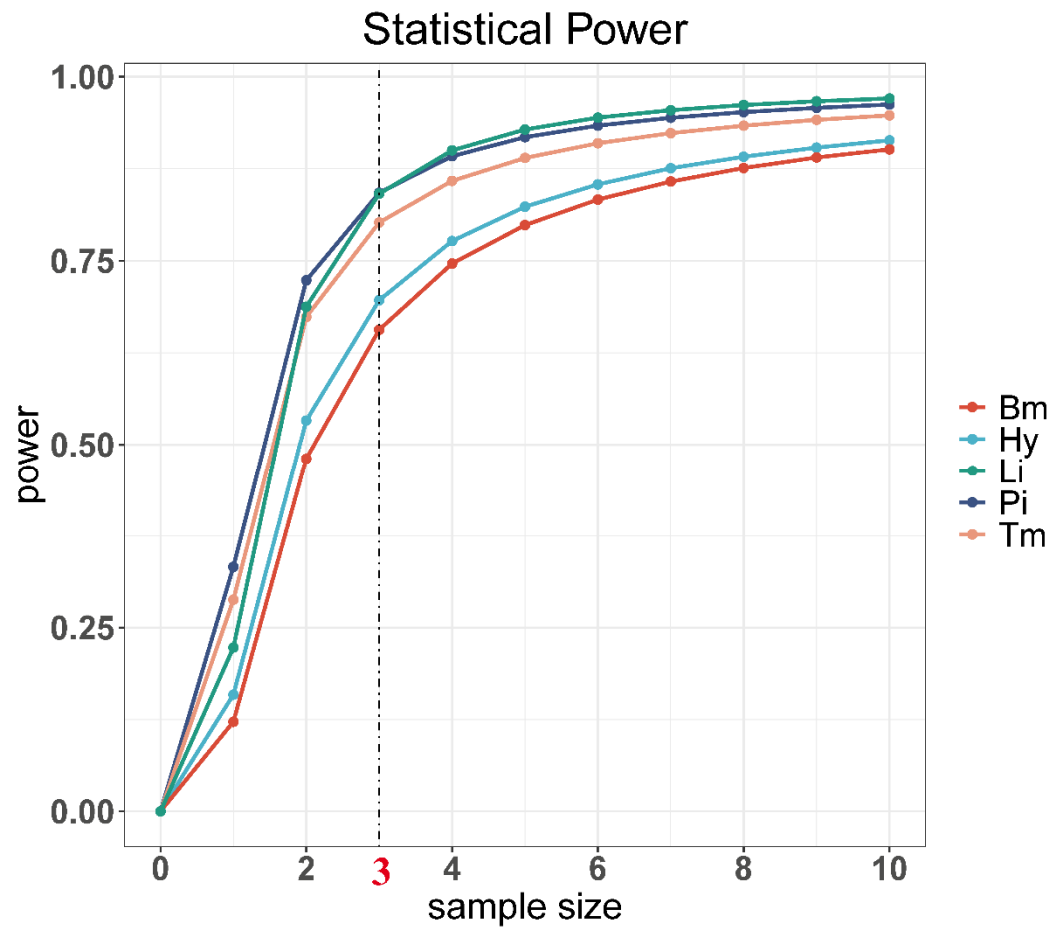

**Figure S2.** The statistical power of RNA-seq differential expression analysis.

The sample size of this RNA-seq was 3, and the statistical power reached 0.69, 0.84, 0.65, 0.80 and 0.84 for hypothalamus, pituitary, breast muscle, thigh muscle and liver, respectively.

Hy, Hypothalamus; Pi, Pituitary; Bm, Breast muscle; Tm, Thigh muscle; Li, Liver.

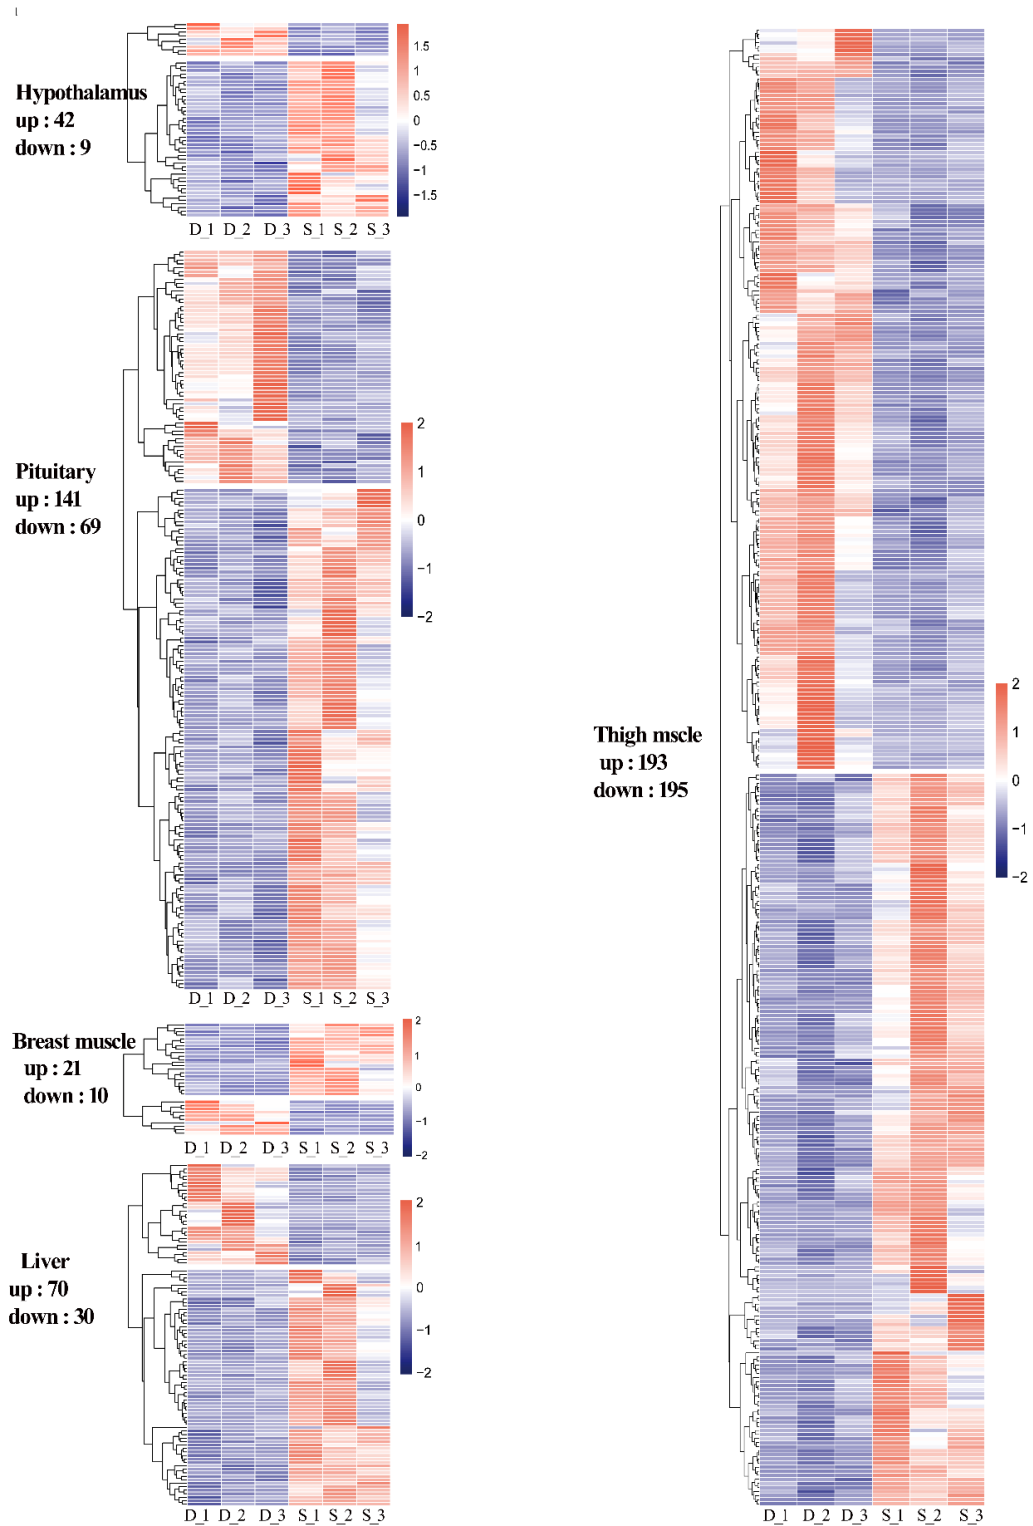

**Figure S3.** The heatmap of DEGs in each tissue

The heatmap showed the clustering analysis of DEGs in each tissue. Each row represents a gene and upregulation in line S is indicated in red, while downregulation in line S is shown in blue. sample ID is indicated underneath the corresponding column. The number represents the number of DEGs in each tissue. Hy, Hypothalamus; Pi, Pituitary; Bm, Breast muscle; Tm, Thigh muscle; Li, Liver.

**Table S1.** Primers used for qRT-PCR

| Gene symbol | Primer sequence, 5' - 3'                                | Product Length<br>(bp) |
|-------------|---------------------------------------------------------|------------------------|
| EDA2R       | F: GCAGAACTTCTCAGGCCAAC<br>R: TGGCTTCTCCCTCTGAAATG      | 176                    |
| ACSL1       | F: GGACAGGCGGATACATCACT<br>R: TGCAGATACAGGTGCTGCTC      | 186                    |
| CD36        | F: CACTGCAATTTGCCAAAAGA<br>R: TCTGCACCACACCCAGTAAC      | 198                    |
| PITX2       | F: CCTCCAAGAAGAAGCGGCAG<br>R: CCATTTGGCTCTGCGGTTCT      | 185                    |
| FABP3       | F: ACGGTGAAGACCCATAGCAC<br>R: TCAACTTCCCATCCTTCAGC      | 193                    |
| FHL2        | F: CAATCAGTGGTCTCGGAGGA<br>R: TTCCACATTCAGGGCAGAGG      | 150                    |
| DNAJB5      | F: AAGCCTCACTCGCACTTCAA<br>R: CGGCTTGATGATGTCGTTGC      | 150                    |
| DUSP1       | F: GTTTAACGAGGCGATTGACTTC<br>R: GGTCCCTCATGAGATAAGCAAGG | 121                    |
| DDX59       | F: GTGGGTGGAAGAGCCATCTA<br>R: GCTGTCCTTTCCACCTGAGA      | 192                    |

Note: F represents the forward primers and R represents the reverse primers.

**Table S2.** Overall statistics and read mapping to the reference for each library

| Sample | Raw Reads | Clean Reads       | Q20    | Q30    | Mapped Ratio | Exonic Rate | Intronic Rate | Intergenic Rate |
|--------|-----------|-------------------|--------|--------|--------------|-------------|---------------|-----------------|
| Hy-D_1 | 55510094  | 55155322 (99.36%) | 97.15% | 92.33% | 93.91%       | 85.26%      | 8.79%         | 5.95%           |
| Hy-D_2 | 48065766  | 47774262 (99.39%) | 97.20% | 92.44% | 93.81%       | 83.03%      | 10.80%        | 6.17%           |
| Hy-D_3 | 57396248  | 57064130 (99.42%) | 97.29% | 92.63% | 93.90%       | 83.91%      | 9.82%         | 6.28%           |
| Hy-S_1 | 50780404  | 50480590 (99.41%) | 97.10% | 92.20% | 93.69%       | 84.00%      | 9.69%         | 6.31%           |
| Hy-S_2 | 47110080  | 46852310 (99.45%) | 97.28% | 92.61% | 93.81%       | 82.85%      | 10.89%        | 6.26%           |
| Hy-S_3 | 51476916  | 51150160 (99.37%) | 97.29% | 92.68% | 93.61%       | 83.43%      | 10.51%        | 6.06%           |
| Pi-D_1 | 49772804  | 49451248 (99.35%) | 97.10% | 92.32% | 92.91%       | 82.22%      | 11.95%        | 5.83%           |
| Pi-D_2 | 50272652  | 49938464 (99.34%) | 97.03% | 92.28% | 92.10%       | 81.25%      | 12.17%        | 6.58%           |
| Pi-D_3 | 52506288  | 52200488 (99.42%) | 97.13% | 92.29% | 93.52%       | 77.97%      | 15.88%        | 6.15%           |
| Pi-S_1 | 49893786  | 49537972 (99.29%) | 96.82% | 92.01% | 90.86%       | 82.92%      | 8.43%         | 8.65%           |
| Pi-S_2 | 52241282  | 51877382 (99.30%) | 96.67% | 91.43% | 91.92%       | 83.35%      | 9.63%         | 7.02%           |
| Pi-S_3 | 49361198  | 49026472 (99.32%) | 97.26% | 92.86% | 91.32%       | 83.34%      | 9.89%         | 6.77%           |
| Li-D_1 | 45262290  | 45014884 (99.45%) | 97.53% | 93.00% | 95.62%       | 88.37%      | 8.64%         | 2.98%           |
| Li-D_2 | 47930970  | 47671476 (99.46%) | 97.69% | 93.46% | 95.29%       | 88.16%      | 8.84%         | 3.00%           |
| Li-D_3 | 57938834  | 57667710 (99.53%) | 97.65% | 93.27% | 95.62%       | 88.31%      | 8.72%         | 2.96%           |
| Li-S_1 | 45789206  | 45552508 (99.48%) | 97.59% | 93.15% | 95.25%       | 86.43%      | 10.06%        | 3.51%           |
| Li-S_2 | 52019412  | 51747550 (99.48%) | 97.67% | 93.43% | 95.02%       | 84.61%      | 11.57%        | 3.83%           |
| Li-S_3 | 50541792  | 50274410 (99.47%) | 97.38% | 92.67% | 95.34%       | 88.20%      | 8.83%         | 2.96%           |
| Bm-D_1 | 55320514  | 55012318 (99.44%) | 97.50% | 93.12% | 90.37%       | 90.36%      | 6.16%         | 3.48%           |
| Bm-D_2 | 50411692  | 50142230 (99.47%) | 97.60% | 93.41% | 89.68%       | 89.88%      | 6.64%         | 3.47%           |
| Bm-D_3 | 52894472  | 52638184 (99.52%) | 97.52% | 93.14% | 90.42%       | 90.78%      | 6.09%         | 3.13%           |
| Bm-S_1 | 50708138  | 50472738 (99.54%) | 97.60% | 93.30% | 90.05%       | 91.22%      | 5.76%         | 3.03%           |
| Bm-S_2 | 51636250  | 51375958 (99.50%) | 97.53% | 93.18% | 89.77%       | 90.37%      | 6.16%         | 3.48%           |
| Bm-S_3 | 56921350  | 56615914 (99.46%) | 97.42% | 92.94% | 89.39%       | 90.46%      | 6.49%         | 3.05%           |
| Tm-D_1 | 44741890  | 44502332 (99.46%) | 97.31% | 92.56% | 93.18%       | 90.36%      | 6.75%         | 2.90%           |
| Tm-D_2 | 49948638  | 49672694 (99.45%) | 97.43% | 92.86% | 94.85%       | 89.26%      | 7.61%         | 3.12%           |
| Tm-D_3 | 51583616  | 51313082 (99.48%) | 97.39% | 92.79% | 91.12%       | 90.64%      | 6.52%         | 2.83%           |
| Tm-S_1 | 45370962  | 45140188 (99.49%) | 97.57% | 93.20% | 91.25%       | 91.15%      | 6.00%         | 2.85%           |

|        |          |                   |        |        |        |        |       |       |
|--------|----------|-------------------|--------|--------|--------|--------|-------|-------|
| Tm-S_2 | 47177656 | 46941784 (99.50%) | 97.81% | 93.81% | 90.17% | 91.25% | 5.81% | 2.95% |
| Tm-S_3 | 45297424 | 45075012 (99.51%) | 97.62% | 93.31% | 91.16% | 91.08% | 6.10% | 2.81% |

Note: Q20 represents an error rate less than 0.01; Q30 represents an error rate less than 0.001.
