# Supplementary material for: Transcriptome Analysis Reveals the Differentially Expressed Genes Associated with Growth in Guangxi Partridge Chickens
Source: Genes (Basel). 2022 Apr 29;13(5):798. doi: 10.3390/genes13050798 (PMC9140345; doi:10.3390/genes13050798)
Supplement: Supplementary file 1 [file genes-13-00798-s001.zip]

Archive with 4 entries (4 files):
- genes-1667907-supplementray material(Figures s1-s3, tables s1,s2).pdf
- Table S3. List of DEGs in each tissue between line S and line D chickens.xlsx
- Table S4. List of significantly enriched GO terms of DEGs.xlsx
- Table S5. List of significantly enriched KEGG pathway of DEGs.xlsx
