# Supplementary material for: Transcriptome Analysis Reveals the Differentially Expressed Genes Associated with Growth in Guangxi Partridge Chickens
Source: Genes (Basel). 2022 Apr 29;13(5):798. doi: 10.3390/genes13050798 (PMC9140345; doi:10.3390/genes13050798)
Supplement: Supplementary file 1 [file genes-13-00798-s001.zip › Table S3. List of DEGs in each tissue between line S and line D chickens.xlsx]

## Sheet: Sheet1
List of DEGs in each tissue between line S and line D chickens
Tissue	id	log2FoldChange	pvalue	adjust	direction	Symbol	Description
Hypothalamus	ncbi_112531154	-3.58807	5.11562e-48	8.17835e-44	down	LOC112531154	uncharacterized protein LOC112531154
Hypothalamus	ncbi_425431	1.40019	3.04257e-10	2.43208e-06	up	LOC425431	dnaJ homolog subfamily A member 1
Hypothalamus	ncbi_418525	1.11703	9.21424e-10	4.91027e-06	up	DSCAM	Down syndrome cell adhesion molecule homolog isoform X1
Hypothalamus	ncbi_419592	1.27311	1.59925e-09	5.35043e-06	up	RSRP1	arginine/serine-rich protein 1
Hypothalamus	ncbi_419009	1.5636	2.00804e-09	5.35043e-06	up	CHORDC1	cysteine and histidine-rich domain-containing protein 1
Hypothalamus	ncbi_417355	2.01265	6.54138e-08	0.000130721	up	JMJD6	bifunctional arginine demethylase and lysyl-hydroxylase JMJD6
Hypothalamus	ncbi_395083	1.1479	5.18093e-07	0.000637135	up	TNFRSF1B	tumor necrosis factor receptor superfamily member 1B precursor
Hypothalamus	MSTRG.21673	-4.43351	6.17015e-07	0.000704587	down	--	arachidonate 12-lipoxygenase, 12R-type-like [Coturnix japonica]
Hypothalamus	ncbi_395090	1.26984	8.3495e-07	0.00088989	up	TNFRSF8	tumor necrosis factor receptor superfamily member 8 isoform X1
Hypothalamus	ncbi_101750341	1.2808	1.00538e-06	0.000970391	up	LOC101750341	nucleolar protein 58-like
Hypothalamus	ncbi_418837	2.25361	1.03188e-06	0.000970391	up	EPSTI1	epithelial-stromal interaction protein 1
Hypothalamus	ncbi_424961	2.48472	1.92353e-06	0.0016185	up	LAMP3	lysosome-associated membrane glycoprotein 3 precursor
Hypothalamus	ncbi_418393	1.26499	6.17573e-06	0.00448415	up	IMPG2	interphotoreceptor matrix proteoglycan 2 precursor
Hypothalamus	ncbi_112531246	4.77431	7.01218e-06	0.00448415	up	LOC112531246	uncharacterized protein LOC112531246
Hypothalamus	ncbi_112532392	6.21935	6.8705e-06	0.00448415	up	LOC112532392	glyceraldehyde-3-phosphate dehydrogenase, testis-specific-like
Hypothalamus	ncbi_425295	-1.60465	7.35956e-06	0.00452528	down	CLCN2	chloride channel protein 2 isoform X1
Hypothalamus	ncbi_101747860	1.33143	8.93127e-06	0.00528831	up	LOC101747860	soluble scavenger receptor cysteine-rich domain-containing protein SSC5D-like isoform X6
Hypothalamus	ncbi_417404	1.7663	1.27347e-05	0.00636216	up	COPRS	coordinator of PRMT5 and differentiation stimulator
Hypothalamus	ncbi_422531	1.01897	1.37657e-05	0.00655515	up	DKK2	dickkopf-related protein 2 isoform X1
Hypothalamus	ncbi_112530439	2.34082	1.47611e-05	0.00655515	up	LOC112530439	uncharacterized protein LOC112530439
Hypothalamus	ncbi_107049117	-2.42089	1.46509e-05	0.00655515	down	LOC107049117	uncharacterized protein LOC107049117 isoform X1
Hypothalamus	ncbi_395326	1.04286	1.58358e-05	0.00666228	up	NFIL3	nuclear factor interleukin-3-regulated protein isoform X1
Hypothalamus	ncbi_425389	1.22911	2.30688e-05	0.00922001	up	BF2	Major histocompatibility complex class I antigen BF2 precursor
Hypothalamus	ncbi_422994	2.81944	2.57483e-05	0.0098009	up	PKP3	plakophilin-3 isoform X1
Hypothalamus	ncbi_423477	-1.03312	2.89102e-05	0.0105043	down	TNFAIP2	tumor necrosis factor alpha-induced protein 2
Hypothalamus	ncbi_107054471	1.69139	3.69241e-05	0.0121445	up	LOC107054471	protocadherin beta-15
Hypothalamus	ncbi_416003	1.26673	4.1668e-05	0.0125688	up	ASB14	ankyrin repeat and SOCS box protein 14
Hypothalamus	ncbi_107054090	1.74959	4.93864e-05	0.0146211	up	LOC107054090	uncharacterized protein LOC107054090
Hypothalamus	ncbi_415645	1.27622	5.55985e-05	0.0156673	up	CETP	cholesteryl ester transfer protein isoform X1
Hypothalamus	ncbi_427821	3.12343	5.4039e-05	0.0156673	up	GAS2L2	GAS2-like protein 2
Hypothalamus	ncbi_771559	1.06508	5.76976e-05	0.0157347	up	SCARF1	scavenger receptor class F member 1
Hypothalamus	ncbi_426175	1.31964	5.86848e-05	0.0157347	up	NXNL2	nucleoredoxin-like protein 2
Hypothalamus	ncbi_422251	1.035	6.62692e-05	0.017368	up	ZIC3	zinc finger protein ZIC 3
Hypothalamus	ncbi_423653	1.2711	7.00684e-05	0.0180675	up	SLC22A15L	solute carrier family 22 member 15-like
Hypothalamus	ncbi_107057545	-3.22603	7.75924e-05	0.0190842	down	LOC107057545	uncharacterized protein LOC107057545 isoform X1
Hypothalamus	ncbi_420148	1.53436	8.16116e-05	0.0194735	up	KLF2	Krueppel-like factor 2
Hypothalamus	ncbi_101752065	3.16098	9.99197e-05	0.0220026	up	LOC101752065	angiopoietin-related protein 7-like
Hypothalamus	ncbi_101751423	-1.07217	0.000106284	0.0226556	down	LOC101751423	uncharacterized protein LOC101751423
Hypothalamus	ncbi_771638	1.22568	0.000115417	0.0242785	up	SDR42E2L	putative short-chain dehydrogenase/reductase family 42E member 2
Hypothalamus	MSTRG.24290	1.26077	0.00011872	0.024333	up	SF1	splicing factor 1, isoform CRA_b [Homo sapiens]
Hypothalamus	ncbi_419818	1.68904	0.000118197	0.024333	up	PI16	peptidase inhibitor 16 isoform X1
Hypothalamus	ncbi_403120	2.04885	0.000120844	0.0244549	up	IFI6	interferon alpha inducible protein 6
Hypothalamus	ncbi_112530302	2.23429	0.000139086	0.0271167	up	LOC112530302	soluble scavenger receptor cysteine-rich domain-containing protein SSC5D-like
Hypothalamus	ncbi_424855	1.40056	0.00015075	0.0286909	up	TM4SF19	transmembrane 4 L6 family member 19 isoform X1
Hypothalamus	ncbi_395712	1.24885	0.000159551	0.0293189	up	ABCB1	ATP binding cassette subfamily B member 1 isoform X1
Hypothalamus	MSTRG.18892	1.46725	0.00015722	0.0293189	up	SDCBP2	syntenin-2 [Meleagris gallopavo]
Hypothalamus	ncbi_419366	1.01915	0.000171508	0.0308079	up	PER3	period circadian protein homolog 3
Hypothalamus	ncbi_107049075	1.98976	0.000176484	0.0313494	up	LOC107049075	dnaJ homolog subfamily B member 1
Hypothalamus	ncbi_374223	-1.0129	0.000242942	0.0368811	down	LEPR	leptin receptor precursor
Hypothalamus	ncbi_419424	1.65154	0.000244536	0.0368811	up	TNFRSF18	tumor necrosis factor receptor superfamily member 18 precursor
Hypothalamus	MSTRG.23376	-2.29706	0.000311205	0.0430547	down	--	rna-directed dna polymerase from mobile element jockey-like [Limosa lapponica baueri]
Pituitary	ncbi_771624	1.46753	1.84391e-13	2.73857e-09	up	C12orf75	overexpressed in colon carcinoma 1 protein homolog isoform X1
Pituitary	ncbi_768091	1.22064	3.0537e-11	1.51179e-07	up	TSC22D3	TSC22 domain family protein 3 isoform X1
Pituitary	ncbi_101750635	-1.72819	2.22513e-11	1.51179e-07	down	NDAHNAKL	neuroblast differentiation-associated protein AHNAK-like
Pituitary	ncbi_427376	2.48747	1.68808e-10	6.26784e-07	up	DNAJA1	dnaJ homolog subfamily A member 1
Pituitary	MSTRG.13620	-2.43827	2.42838e-10	7.21327e-07	down	--	Kelch domain-containing protein 8B, partial [Opisthocomus hoazin]
Pituitary	ncbi_112532392	8.30638	8.57853e-10	2.12347e-06	up	LOC112532392	glyceraldehyde-3-phosphate dehydrogenase, testis-specific-like
Pituitary	MSTRG.1255	3.4414	1.00316e-09	2.12841e-06	up	--	-
Pituitary	ncbi_395429	-3.0327	7.80661e-09	1.4493e-05	down	POSTN	periostin isoform X1
Pituitary	ncbi_419818	2.56515	1.02102e-08	1.68492e-05	up	PI16	peptidase inhibitor 16 isoform X1
Pituitary	MSTRG.9675	4.81923	1.25692e-08	1.86678e-05	up	--	-
Pituitary	ncbi_418525	1.9669	1.44364e-08	1.90766e-05	up	DSCAM	Down syndrome cell adhesion molecule homolog isoform X1
Pituitary	MSTRG.17858	2.12818	1.54133e-08	1.90766e-05	up	--	PREDICTED: uncharacterized protein LOC103922183 [Pygoscelis adeliae]
Pituitary	ncbi_416073	-2.59846	1.68716e-08	1.92751e-05	down	C12H3orf14	uncharacterized protein C3orf14 homolog
Pituitary	ncbi_421640	1.62818	2.85434e-08	2.82617e-05	up	SYNE1	nesprin-1 isoform X1
Pituitary	ncbi_100858942	6.87454	2.70968e-08	2.82617e-05	up	LOC100858942	glucagon
Pituitary	MSTRG.18020	-1.58107	6.64052e-08	6.16406e-05	down	--	-
Pituitary	ncbi_107053955	3.66115	7.67956e-08	6.70923e-05	up	LOC107053955	uncharacterized protein LOC107053955
Pituitary	ncbi_424214	-1.25093	1.23883e-07	0.000102217	down	PLCD4	1-phosphatidylinositol 4,5-bisphosphate phosphodiesterase delta-4 isoform X1
Pituitary	ncbi_423426	1.34489	2.2635e-07	0.000167049	up	UNC79	protein unc-79 homolog isoform X1
Pituitary	ncbi_428910	-1.73953	2.23963e-07	0.000167049	down	MOK	MAPK/MAK/MRK overlapping kinase isoform X1
Pituitary	ncbi_770336	2.13697	2.36199e-07	0.000167049	up	PRC1	protein regulator of cytokinesis 1
Pituitary	ncbi_395937	1.12192	3.27789e-07	0.000202847	up	TSHB	thyrotropin subunit beta isoform X1
Pituitary	ncbi_396243	1.25086	3.01203e-07	0.000202847	up	COL1A2	collagen alpha-2(I) chain precursor
Pituitary	ncbi_770624	3.65543	3.14408e-07	0.000202847	up	GRXCR1	glutaredoxin domain-containing cysteine-rich protein 1 isoform X1
Pituitary	ncbi_112531022	1.83889	3.92556e-07	0.000232355	up	LOC112531022	uncharacterized protein LOC112531022 isoform X1
Pituitary	ncbi_112531246	8.09001	4.06762e-07	0.000232355	up	LOC112531246	uncharacterized protein LOC112531246
Pituitary	ncbi_770635	1.15743	4.75154e-07	0.000248398	up	COPS9	myeloma-overexpressed gene 2 protein
Pituitary	ncbi_418567	1.28563	4.85022e-07	0.000248398	up	DDX3X	ATP-dependent RNA helicase DDX3X isoform X1
Pituitary	ncbi_416271	2.01815	4.54729e-07	0.000248398	up	MYOZ3	myozenin-3
Pituitary	ncbi_415360	2.18213	5.32472e-07	0.000263609	up	DNAJA4	dnaJ homolog subfamily A member 4 isoform X1
Pituitary	MSTRG.21673	-4.86267	5.53672e-07	0.000265263	down	--	arachidonate 12-lipoxygenase, 12R-type-like [Coturnix japonica]
Pituitary	ncbi_428247	1.7362	6.55134e-07	0.000304064	up	HTR3A	5-hydroxytryptamine receptor 3A
Pituitary	ncbi_374223	-1.24284	7.7088e-07	0.000346943	down	LEPR	leptin receptor precursor
Pituitary	ncbi_107052707	1.40604	8.53998e-07	0.000373047	up	CEBPD	CCAAT/enhancer-binding protein delta
Pituitary	ncbi_415914	-1.46781	1.04133e-06	0.000429605	down	C12H3orf18	uncharacterized protein C3orf18 homolog isoform X1
Pituitary	ncbi_100858089	-2.73457	1.03354e-06	0.000429605	down	R3HDML	peptidase inhibitor R3HDML
Pituitary	ncbi_416174	2.34991	1.08569e-06	0.000435802	up	GABRP	gamma-aminobutyric acid receptor subunit pi
Pituitary	ncbi_769832	1.1506	1.30256e-06	0.000496043	up	CCDC3	coiled-coil domain-containing protein 3
Pituitary	ncbi_427213	-1.33238	1.28341e-06	0.000496043	down	F2RL1	proteinase-activated receptor 2 precursor
Pituitary	ncbi_395532	1.44715	1.55882e-06	0.000578789	up	COL1A1	collagen alpha-1(I) chain
Pituitary	ncbi_428182	1.95631	1.78172e-06	0.000645419	up	TAS1R3	taste receptor type 1 member 3
Pituitary	ncbi_428459	1.291	2.0874e-06	0.000738144	up	ARPP21	cAMP-regulated phosphoprotein 21 isoform X1
Pituitary	ncbi_422531	1.1998	2.30665e-06	0.000788332	up	DKK2	dickkopf-related protein 2 isoform X1
Pituitary	ncbi_423462	2.3314	2.33548e-06	0.000788332	up	LOC423462	uncharacterized protein LOC423462 isoform X1
Pituitary	ncbi_770205	1.30985	2.46876e-06	0.000814802	up	ABRACL	costars family protein ABRACL isoform X1
Pituitary	ncbi_374260	1.83709	2.65806e-06	0.000858207	up	CHEK1	serine/threonine-protein kinase Chk1 isoform X1
Pituitary	ncbi_101747860	1.31173	3.73778e-06	0.00118114	up	LOC101747860	soluble scavenger receptor cysteine-rich domain-containing protein SSC5D-like isoform X6
Pituitary	ncbi_421533	1.07885	4.0154e-06	0.00124243	up	CCSAP	centriole, cilia and spindle-associated protein
Pituitary	ncbi_423678	1.39106	4.60883e-06	0.00139694	up	PAPSS2	bifunctional 3'-phosphoadenosine 5'-phosphosulfate synthase 2 isoform X1
Pituitary	ncbi_424117	-1.52454	4.81989e-06	0.0014317	down	PPP1R1C	protein phosphatase 1 regulatory subunit 1C isoform X2
Pituitary	ncbi_768861	1.54481	7.03537e-06	0.00201946	up	DNAH17	dynein heavy chain 17, axonemal isoform X1
Pituitary	ncbi_396423	2.62736	7.07056e-06	0.00201946	up	VIL1	villin-1
Pituitary	MSTRG.22860	-1.50824	7.48478e-06	0.00209743	down	--	PREDICTED: uncharacterized protein LOC100560823 isoform X4 [Anolis carolinensis]
Pituitary	ncbi_101747844	-2.06529	7.97783e-06	0.0021942	down	LOC101747844	carbohydrate sulfotransferase 9
Pituitary	ncbi_422213	1.6023	8.29905e-06	0.00224105	up	SLC7A3	cationic amino acid transporter 3
Pituitary	ncbi_112531842	2.61184	8.84743e-06	0.00234646	up	LOC112531842	transthyretin-like
Pituitary	ncbi_424668	-2.26293	9.294e-06	0.00242166	down	C8H1orf168	FYN-binding protein 2 isoform X1
Pituitary	ncbi_100859737	-1.13645	1.00709e-05	0.00257884	down	TUBA1A1	tubulin alpha-1B chain
Pituitary	ncbi_396084	2.21292	1.02653e-05	0.00258407	up	ACTG2	actin, gamma-enteric smooth muscle
Pituitary	ncbi_431599	2.0245	1.10214e-05	0.00272817	up	ZNF366	zinc finger protein 366
Pituitary	ncbi_421595	1.69241	1.15657e-05	0.00281597	up	CSTF3	cleavage stimulation factor subunit 3
Pituitary	MSTRG.23911	-1.61237	1.17649e-05	0.00281826	down	gag-pol	protein NYNRIN-like [Anas platyrhynchos]
Pituitary	ncbi_427746	2.38685	1.33639e-05	0.00315048	up	YF5	MHC class I antigen YF5 isoform X1
Pituitary	ncbi_416820	1.22587	1.42404e-05	0.00330466	up	DDX55	ATP-dependent RNA helicase DDX55
Pituitary	ncbi_421811	1.54734	1.45903e-05	0.00333377	up	MDN1	midasin isoform X1
Pituitary	ncbi_396379	1.12867	1.52667e-05	0.00343547	up	HMGCS1	hydroxymethylglutaryl-CoA synthase, cytoplasmic isoform X1
Pituitary	ncbi_415698	1.13683	1.80466e-05	0.00382897	up	GNAO1	guanine nucleotide-binding protein G(o) subunit alpha isoform X1
Pituitary	ncbi_428263	-1.98414	1.78929e-05	0.00382897	down	AVPR1B	vasopressin V1b receptor
Pituitary	ncbi_107054849	2.28166	1.75411e-05	0.00382897	up	LOC107054849	E3 ubiquitin-protein ligase RNF182-like isoform X1
Pituitary	ncbi_374218	-2.89047	1.84809e-05	0.00386589	down	CRHR1	corticotropin-releasing factor receptor 1 precursor
Pituitary	ncbi_395998	-1.10217	2.15278e-05	0.0044407	down	SORL1	sortilin-related receptor isoform X1
Pituitary	ncbi_100859413	1.82611	2.35444e-05	0.00479015	up	UBE2C	ubiquitin-conjugating enzyme E2 C
Pituitary	MSTRG.17719	3.15333	2.49969e-05	0.00501694	up	--	-
Pituitary	ncbi_770009	1.41921	2.55733e-05	0.0050642	up	FOXJ1	forkhead box protein J1
Pituitary	ncbi_418097	1.1486	2.79308e-05	0.00545827	up	SYCP3	synaptonemal complex protein 3 isoform X1
Pituitary	ncbi_112530942	1.54669	3.08935e-05	0.00588244	up	LOC112530942	uncharacterized protein LOC112530942
Pituitary	ncbi_419262	1.15914	3.15835e-05	0.00593769	up	RTEL1	regulator of telomere elongation helicase 1 isoform X1
Pituitary	ncbi_418393	1.56133	3.24187e-05	0.00601854	up	IMPG2	interphotoreceptor matrix proteoglycan 2 precursor
Pituitary	ncbi_427615	-2.07621	3.50572e-05	0.00634963	down	STARD10	START domain-containing protein 10
Pituitary	MSTRG.2451	2.99226	3.77566e-05	0.00659719	up	--	-
Pituitary	ncbi_396205	1.17876	3.98822e-05	0.0068084	up	NFYB	nuclear transcription factor Y subunit beta
Pituitary	ncbi_408049	2.41866	3.97119e-05	0.0068084	up	CDH10	cadherin-10 isoform X1
Pituitary	ncbi_418789	1.09479	4.10588e-05	0.00692961	up	DZIP1	zinc finger protein DZIP1 isoform X1
Pituitary	ncbi_395094	1.93002	4.29933e-05	0.00717458	up	FGFBP2	fibroblast growth factor-binding protein 2 isoform X1
Pituitary	ncbi_421194	1.09568	4.55797e-05	0.00738304	up	AHSA2	activator of 90 kDa heat shock protein ATPase homolog 2
Pituitary	ncbi_424154	1.38149	4.49567e-05	0.00738304	up	METTL8	methyltransferase-like protein 8 isoform X1
Pituitary	ncbi_418470	1.53806	4.75889e-05	0.00751905	up	SAMSN1	SAM domain-containing protein SAMSN-1
Pituitary	MSTRG.22326	7.22369	4.7193e-05	0.00751905	up	--	coiled-coil domain-containing protein 171 isoform X4 [Gallus gallus]
Pituitary	MSTRG.18853	-1.20172	5.18755e-05	0.00786179	down	--	hypothetical protein H355_007518 [Colinus virginianus]
Pituitary	ncbi_769473	-1.26033	5.13694e-05	0.00786179	down	CFAP70	cilia- and flagella-associated protein 70 isoform X1
Pituitary	ncbi_428217	1.36942	5.14769e-05	0.00786179	up	TMEM200B	transmembrane protein 200B
Pituitary	ncbi_428328	1.44196	5.18058e-05	0.00786179	up	ATP8B3	phospholipid-transporting ATPase IK isoform X1
Pituitary	ncbi_417607	1.03023	5.27499e-05	0.00791355	up	SHPK	sedoheptulokinase isoform X1
Pituitary	ncbi_107053767	-1.59458	5.69196e-05	0.00837	down	YBEY	endoribonuclease YbeY isoform X1
Pituitary	ncbi_101749229	1.89948	5.63997e-05	0.00837	up	PLA2G4B	cytosolic phospholipase A2 beta isoform X1
Pituitary	ncbi_107050420	1.51809	5.75505e-05	0.0083798	up	LOC107050420	arf-GAP with Rho-GAP domain, ANK repeat and PH domain-containing protein 1
Pituitary	ncbi_769927	1.59667	5.81881e-05	0.00839039	up	LOXL4	lysyl oxidase homolog 4 isoform X1
Pituitary	ncbi_101749214	1.25066	6.1232e-05	0.0087444	up	LOC101749214	reelin domain-containing protein 1
Pituitary	ncbi_395887	1.92888	6.26018e-05	0.00885488	up	AMH	muellerian-inhibiting factor precursor
Pituitary	MSTRG.10186	1.9378	6.37945e-05	0.00893846	up	--	hypothetical protein ASZ78_002449 [Callipepla squamata]
Pituitary	ncbi_373943	-1.73586	6.46103e-05	0.00896815	down	TBX20	T-box transcription factor TBX20
Pituitary	ncbi_100859032	6.51076	6.73295e-05	0.00925905	up	IFNAL6	interferon type A1/A2
Pituitary	MSTRG.11497	5.51877	7.0279e-05	0.009576	up	--	glycerol kinase [Limosa lapponica baueri]
Pituitary	ncbi_100858576	1.4708	7.89703e-05	0.0106624	up	CLK1	dual specificity protein kinase CLK1 isoform X1
Pituitary	MSTRG.6256	-1.39391	8.34856e-05	0.0111705	down	--	DNA-dependent protein kinase catalytic subunit, partial [Gallus gallus]
Pituitary	ncbi_417349	1.55627	8.51391e-05	0.01129	up	RASL10A	RAS-like, family 10, member A
Pituitary	ncbi_415818	1.047	8.64235e-05	0.011359	up	CRISPLD2	cysteine-rich secretory protein LCCL domain-containing 2
Pituitary	ncbi_426584	1.85626	8.78965e-05	0.0114512	up	MATN2	matrilin-2 isoform X1
Pituitary	ncbi_415996	1.05502	9.4288e-05	0.0119702	up	CACNA2D3	voltage-dependent calcium channel subunit alpha-2/delta-3 isoform X1
Pituitary	ncbi_416324	1.0741	9.42983e-05	0.0119702	up	ACSL6	long-chain-fatty-acid--CoA ligase 6 isoform X1
Pituitary	ncbi_395074	-1.05892	9.98702e-05	0.0124645	down	CCDC80	coiled-coil domain-containing protein 80 precursor
Pituitary	ncbi_419748	-1.08273	0.000102941	0.0127406	down	UBASH3B	ubiquitin-associated and SH3 domain-containing protein B
Pituitary	ncbi_112533347	9.74495	0.000104402	0.0128147	up	LOC112533347	proline-rich protein 36-like
Pituitary	ncbi_768538	1.81061	0.000114215	0.01368	up	SPTLC3	serine palmitoyltransferase 3
Pituitary	MSTRG.3180	-2.84017	0.000120504	0.0142042	down	--	rna-directed dna polymerase from mobile element jockey-like [Limosa lapponica baueri]
Pituitary	ncbi_100858067	-1.50245	0.000126582	0.0148031	down	KCNA6	potassium voltage-gated channel subfamily A member 6
Pituitary	ncbi_416818	-1.44858	0.000129033	0.0149719	down	DNAH10	dynein heavy chain 10, axonemal
Pituitary	ncbi_770196	1.10883	0.000140526	0.0155753	up	NEK3	serine/threonine-protein kinase Nek3 isoform X1
Pituitary	MSTRG.7241	1.5184	0.000138138	0.0155753	up	--	Cancer-up-regulated gene 2 protein [Anas platyrhynchos]
Pituitary	ncbi_101748867	-2.13443	0.000137582	0.0155753	down	ZONADHL	zonadhesin-like isoform X1
Pituitary	ncbi_100857615	-3.94435	0.000140083	0.0155753	down	LOC100857615	platelet glycoprotein VI isoform X2
Pituitary	ncbi_107053632	-5.23854	0.000138109	0.0155753	down	LOC107053632	uncharacterized protein LOC107053632
Pituitary	ncbi_107055587	-2.12406	0.000144211	0.0158653	down	LOC107055587	LOW QUALITY PROTEIN: RANBP2-like and GRIP domain-containing protein 5/6
Pituitary	ncbi_415832	-1.87718	0.000145314	0.0158691	down	SLC7A5	large neutral amino acids transporter small subunit 1
Pituitary	ncbi_427812	-1.32478	0.000154657	0.0166447	down	KCNJ16	inward rectifier potassium channel 16
Pituitary	ncbi_112532726	2.05747	0.000157727	0.0168529	up	LOC112532726	uncharacterized protein LOC112532726
Pituitary	ncbi_415623	1.525	0.000160969	0.0170227	up	TLR21	Toll-like receptor 21 precursor
Pituitary	ncbi_101748308	2.5105	0.000166097	0.0172508	up	LOC101748308	uncharacterized protein LOC101748308
Pituitary	ncbi_101748927	2.5105	0.000166097	0.0172508	up	LOC101748927	uncharacterized protein LOC101748927
Pituitary	ncbi_418432	-1.17283	0.000168187	0.0173466	down	NSUN3	tRNA (cytosine(34)-C(5))-methyltransferase, mitochondrial isoform X1
Pituitary	ncbi_396119	2.03004	0.000173211	0.0177415	up	FST	follistatin precursor
Pituitary	ncbi_100857843	1.06942	0.000180643	0.0183761	up	LOC100857843	RNA-binding Raly-like protein isoform X1
Pituitary	ncbi_112530174	2.20471	0.000182543	0.018443	up	LOC112530174	mucin-22-like
Pituitary	ncbi_100858776	1.19683	0.000188557	0.018795	up	NEDD8	NEDD8 isoform X2
Pituitary	ncbi_418049	-1.52446	0.000191591	0.0188444	down	TST	thiosulfate sulfurtransferase
Pituitary	ncbi_427613	2.65348	0.000190697	0.0188444	up	FOXI1	forkhead box protein I1
Pituitary	ncbi_395452	1.26167	0.000207847	0.0199058	up	RDH5	11-cis retinol dehydrogenase precursor
Pituitary	ncbi_100859903	1.2672	0.000210424	0.0199058	up	HYAL3	hyaluronidase-3 isoform X1
Pituitary	ncbi_107053378	1.59955	0.000209766	0.0199058	up	ASCL3	achaete-scute homolog 3
Pituitary	ncbi_424037	1.47697	0.000214143	0.0201295	up	LSS	lanosterol synthase
Pituitary	ncbi_771101	-1.10482	0.000216488	0.0202218	down	HEYL	hairy/enhancer-of-split related with YRPW motif-like protein
Pituitary	ncbi_768421	1.25633	0.000225071	0.0207624	up	HK3	hexokinase-3 isoform X1
Pituitary	MSTRG.15616	-2.587	0.000226985	0.0208098	down	--	-
Pituitary	ncbi_772325	-1.17324	0.000252663	0.0218385	down	NR6A1	nuclear receptor subfamily 6 group A member 1 isoform X1
Pituitary	ncbi_404229	1.45479	0.000249061	0.0218385	up	POPDC2	popeye domain-containing protein 2
Pituitary	ncbi_418336	-2.03415	0.000252464	0.0218385	down	SLC22A15	solute carrier family 22 member 15 isoform X1
Pituitary	ncbi_417404	2.11759	0.000249058	0.0218385	up	COPRS	coordinator of PRMT5 and differentiation stimulator
Pituitary	ncbi_416298	-2.79912	0.000249309	0.0218385	down	PKD2L2	polycystic kidney disease 2-like 2 protein isoform X1
Pituitary	ncbi_416054	1.45513	0.000256129	0.0219543	up	KLHDC8B	kelch domain-containing protein 8B
Pituitary	ncbi_112533566	1.72869	0.000258685	0.0219543	up	LOC112533566	arf-GAP with Rho-GAP domain, ANK repeat and PH domain-containing protein 1-like
Pituitary	ncbi_772243	1.82943	0.000258551	0.0219543	up	LOC772243	MLV-related proviral Env polyprotein-like
Pituitary	ncbi_419170	-1.12431	0.000264834	0.0222221	down	PPP1R16B	protein phosphatase 1 regulatory inhibitor subunit 16B isoform X1
Pituitary	ncbi_419088	-1.71431	0.000263471	0.0222221	down	TSKU	tsukushin precursor
Pituitary	ncbi_112530987	1.53238	0.000270898	0.0226033	up	LOC112530987	poly [ADP-ribose] polymerase 10-like
Pituitary	ncbi_422997	-1.31515	0.000279014	0.0230218	down	PTDSS2	phosphatidylserine synthase 2
Pituitary	MSTRG.9212	3.73349	0.000277878	0.0230218	up	--	-
Pituitary	ncbi_100859081	1.58035	0.000287434	0.0235854	up	DYNLL1	dynein light chain 1, cytoplasmic
Pituitary	ncbi_428164	1.04971	0.000303935	0.0246863	up	PLTP	phospholipid transfer protein isoform X1
Pituitary	ncbi_396503	-1.6957	0.000304174	0.0246863	down	COL17A1	collagen alpha-1(XVII) chain
Pituitary	ncbi_107050363	1.04607	0.000311476	0.0251416	up	LOC107050363	N6-adenosine-methyltransferase catalytic subunit
Pituitary	ncbi_417035	-1.88773	0.000322413	0.0257445	down	BG8	MHC B-G antigen isoform 1 precursor
Pituitary	ncbi_423504	3.13618	0.000321897	0.0257445	up	HSPA2	heat shock 70 kDa protein
Pituitary	ncbi_396487	1.1293	0.000337443	0.026356	up	HSPA5	endoplasmic reticulum chaperone BiP precursor
Pituitary	MSTRG.19995	-1.52867	0.000338944	0.026356	down	--	uncharacterized protein LOC115616258 [Strigops habroptila]
Pituitary	ncbi_418052	2.05857	0.000336263	0.026356	up	NCF4	neutrophil cytosol factor 4
Pituitary	ncbi_424853	1.02724	0.000369258	0.0282692	up	D2HGDH	D-2-hydroxyglutarate dehydrogenase, mitochondrial
Pituitary	ncbi_419687	-1.09942	0.0003775	0.0286053	down	FUCA1	tissue alpha-L-fucosidase
Pituitary	ncbi_418791	-1.06745	0.000380385	0.0286776	down	ABCC4	multidrug resistance-associated protein 4
Pituitary	ncbi_431566	1.5317	0.000385354	0.0287602	up	ADGRV1	G-protein coupled receptor 98 isoform X1
Pituitary	ncbi_396242	1.80076	0.000385229	0.0287602	up	COL9A3	collagen alpha-3(IX) chain precursor
Pituitary	ncbi_771265	1.55036	0.000408171	0.0303108	up	CBLN1	cerebellin-1
Pituitary	ncbi_101750922	1.00502	0.000413544	0.030557	up	SETD6	N-lysine methyltransferase SETD6 isoform X1
Pituitary	ncbi_415886	1.12107	0.000421016	0.0306651	up	ADAT1	tRNA-specific adenosine deaminase 1 isoform X1
Pituitary	ncbi_107049269	1.27372	0.000453591	0.032374	up	GLYATL3W	glycine N-acyltransferase-like protein 3 isoform X1
Pituitary	ncbi_419010	1.7283	0.000470065	0.0330198	up	NAALAD2	N-acetylated-alpha-linked acidic dipeptidase 2 isoform X1
Pituitary	ncbi_112530034	2.44743	0.000473554	0.0330198	up	LOC112530034	uncharacterized protein LOC112530034
Pituitary	ncbi_771559	1.21174	0.000478895	0.0332362	up	SCARF1	scavenger receptor class F member 1
Pituitary	ncbi_417097	-1.03075	0.000487609	0.0336836	down	GOLGA1	golgin subfamily A member 1
Pituitary	ncbi_418048	-1.10188	0.000500561	0.0342596	down	MPST	3-mercaptopyruvate sulfurtransferase isoform X1
Pituitary	ncbi_423014	1.1948	0.000498322	0.0342596	up	PLCB2	1-phosphatidylinositol 4,5-bisphosphate phosphodiesterase beta-2 isoform X1
Pituitary	ncbi_419970	1.21112	0.000529039	0.0358781	up	FAM187A	coiled-coil domain-containing protein 103
Pituitary	MSTRG.2848	4.05578	0.000528986	0.0358781	up	--	hypothetical protein Anapl_13961 [Anas platyrhynchos]
Pituitary	ncbi_429016	-1.06273	0.000533404	0.0360096	down	TTC30B	tetratricopeptide repeat protein 30A
Pituitary	ncbi_395451	-1.22221	0.000537324	0.0361101	down	CXCL14	C-X-C motif chemokine 14 precursor
Pituitary	ncbi_414897	-1.11593	0.000543684	0.0362098	down	KMT2A	histone-lysine N-methyltransferase 2A isoform X1
Pituitary	ncbi_426544	-1.98337	0.000542395	0.0362098	down	FAM46C	putative nucleotidyltransferase FAM46C
Pituitary	ncbi_100859373	-1.04008	0.000561969	0.0367681	down	PLEKHG4	puratrophin-1 isoform X1
Pituitary	ncbi_418808	1.26459	0.000560607	0.0367681	up	MYCBP2	E3 ubiquitin-protein ligase MYCBP2 isoform X5
Pituitary	ncbi_395092	-1.50634	0.00055738	0.0367681	down	PDE6B	rod cGMP-specific 3',5'-cyclic phosphodiesterase subunit beta isoform X1
Pituitary	ncbi_419279	2.04722	0.00057527	0.0374733	up	CCM2L	cerebral cavernous malformations 2 protein-like isoform X1
Pituitary	ncbi_395818	1.15507	0.000581567	0.0377181	up	CTSK	cathepsin K precursor
Pituitary	ncbi_419422	2.19684	0.000585399	0.0378015	up	FAM132A	adipolin
Pituitary	ncbi_101748402	1.42434	0.000589088	0.0378751	up	NEBL1	nebulin isoform X29
Pituitary	ncbi_101749795	1.60921	0.000608929	0.0386488	up	LOC101749795	uncharacterized protein LOC101749795
Pituitary	ncbi_422174	-1.18693	0.00062576	0.0394173	down	LAS1L	ribosomal biogenesis protein LAS1L
Pituitary	ncbi_395752	1.40492	0.000626345	0.0394173	up	NKX6-1	LOW QUALITY PROTEIN: homeobox protein Nkx-6.1
Pituitary	ncbi_416628	-1.28644	0.000647536	0.0404084	down	RMI2	recQ-mediated genome instability protein 2
Pituitary	ncbi_107049790	-1.04479	0.000662223	0.0408105	down	LOC107049790	LOW QUALITY PROTEIN: voltage-dependent P/Q-type calcium channel subunit alpha-1A
Pituitary	ncbi_430998	-1.34099	0.000660148	0.0408105	down	EVI5L	EVI5-like protein isoform X1
Pituitary	ncbi_776636	1.7564	0.000692349	0.0424908	up	LRRC46	leucine-rich repeat-containing protein 46 isoform X1
Pituitary	ncbi_396149	1.38175	0.000706113	0.0428049	up	CNTN4	contactin-4 isoform X1
Pituitary	ncbi_424133	-1.2535	0.000718141	0.0431815	down	PDE11A	dual 3',5'-cyclic-AMP and -GMP phosphodiesterase 11A
Pituitary	ncbi_396477	2.70518	0.000717904	0.0431815	up	LOC396477	hepatic lectin
Pituitary	ncbi_427899	-1.30913	0.000722421	0.0432637	down	44807	neuronal-specific septin-3 isoform X1
Pituitary	ncbi_420216	1.10949	0.00073675	0.0439446	up	SLC7AL	Y+L amino acid transporter 2
Pituitary	ncbi_395330	-1.54404	0.000766584	0.0451798	down	PTPRJ	receptor-type tyrosine-protein phosphatase eta precursor
Pituitary	ncbi_374092	1.17322	0.00079168	0.0464744	up	CRY2	cryptochrome-2
Pituitary	ncbi_419060	-1.44579	0.000811287	0.0474379	down	DNAJB13	dnaJ homolog subfamily B member 13 isoform X1
Pituitary	MSTRG.11494	4.73995	0.000852655	0.0492749	up	--	-
Pituitary	ncbi_768860	1.09262	0.000862679	0.0496609	up	NDUFA2	NADH dehydrogenase [ubiquinone] 1 alpha subcomplex subunit 2
Breast muscle	ncbi_771780	2.40917	3.03e-09	2.05e-05	up	SMPX	small muscular protein isoform X1
Breast muscle	ncbi_374192	2.85111	3.28e-09	2.05e-05	up	DUSP1	dual specificity protein phosphatase 1
Breast muscle	ncbi_419592	2.01975	1.23e-08	5.12e-05	up	RSRP1	arginine/serine-rich protein 1
Breast muscle	ncbi_101747587	1.44059	3.97e-08	9.93e-05	up	UBB	polyubiquitin-B
Breast muscle	ncbi_418099	4.07871	3.19e-08	9.93e-05	up	MYBPC1	myosin-binding protein C, slow-type isoform X1
Breast muscle	ncbi_107053650	1.91386	1.23e-07	0.000256848	up	DDIT4	DNA damage-inducible transcript 4 protein
Breast muscle	ncbi_420642	-2.11258	3.74e-07	0.000668789	down	GALNT15	polypeptide N-acetylgalactosaminyltransferase 15 isoform X1
Breast muscle	ncbi_427409	2.35589	5.83e-07	0.00091264	up	DNAJB5	dnaJ homolog subfamily B member 5 isoform X1
Breast muscle	ncbi_420523	1.53248	7.71e-07	0.000964983	up	CUBN	cubilin isoform X1
Breast muscle	ncbi_426549	-1.58407	7.07e-07	0.000964983	down	RETSAT	all-trans-retinol 13,14-reductase
Breast muscle	ncbi_427452	1.77077	1.19e-06	0.00135662	up	FRMD3	FERM domain-containing protein 3 isoform X1
Breast muscle	ncbi_107054090	1.73876	2.52e-06	0.00262537	up	LOC107054090	uncharacterized protein LOC107054090
Breast muscle	ncbi_424346	2.13462	2.95e-06	0.00284088	up	DDX59	probable ATP-dependent RNA helicase DDX59
Breast muscle	ncbi_768350	1.71043	4.68e-06	0.00418182	up	MHCIY	MHC-like class I Y isoform X3
Breast muscle	ncbi_420757	1.7917	1.25e-05	0.0104197	up	ITGA9	integrin alpha-9 precursor
Breast muscle	ncbi_772125	1.26625	1.41e-05	0.0110602	up	AMPD1	AMP deaminase 1 isoform X1
Breast muscle	ncbi_423456	1.3027	2.62e-05	0.0185741	up	SLC25A29	mitochondrial basic amino acids transporter
Breast muscle	ncbi_421934	-1.59224	2.67e-05	0.0185741	down	KLF11	Krueppel-like factor 11
Breast muscle	ncbi_415780	1.45672	4.35e-05	0.0272236	up	LOC415780	transcription initiation factor TFIID subunit 4 isoform X1
Breast muscle	ncbi_112531154	-2.93656	4.29e-05	0.0272236	down	LOC112531154	uncharacterized protein LOC112531154
Breast muscle	ncbi_772114	-1.35577	5.24e-05	0.0285193	down	AGPAT2	1-acyl-sn-glycerol-3-phosphate acyltransferase beta isoform X1
Breast muscle	ncbi_418726	-2.455	5e-05	0.0285193	down	FHL2	four and a half LIM domains protein 2
Breast muscle	MSTRG.6940	2.27881	6.66e-05	0.0333931	up	--	collagen alpha-1(XXIV) chain isoform X4 [Gallus gallus]
Breast muscle	ncbi_107049448	-3.45154	6.67e-05	0.0333931	down	LOC107049448	claudin-7-like isoform X1
Breast muscle	ncbi_107054745	-1.34571	8.18e-05	0.0372498	down	UBALD2	UBA-like domain-containing protein 2 isoform X1
Breast muscle	MSTRG.15301	2.09496	7.75e-05	0.0372498	up	--	-
Breast muscle	ncbi_425783	-2.98905	8.33e-05	0.0372498	down	CLC2DL3	C-type lectin domain family 2 member D-like
Breast muscle	ncbi_418845	2.42387	8.67e-05	0.0374134	up	SLC25A30	kidney mitochondrial carrier protein 1 isoform X1
Breast muscle	ncbi_418808	1.14099	9.03e-05	0.0376636	up	MYCBP2	E3 ubiquitin-protein ligase MYCBP2 isoform X5
Breast muscle	ncbi_417306	2.5307	0.000108656	0.0424914	up	MYH1D	myosin-1B
Breast muscle	MSTRG.6256	-2.33304	0.000112414	0.0426288	down	--	DNA-dependent protein kinase catalytic subunit, partial [Gallus gallus]
Thigh muscle	ncbi_418099	-1.90772	7.92e-12	5.4e-08	down	MYBPC1	myosin-binding protein C, slow-type isoform X1
Thigh muscle	ncbi_416326	2.7466	8.42e-12	5.4e-08	up	P4HA2	prolyl 4-hydroxylase subunit alpha-2 isoform X1
Thigh muscle	ncbi_424346	3.14427	2.21e-11	9.47e-08	up	DDX59	probable ATP-dependent RNA helicase DDX59
Thigh muscle	ncbi_423892	2.21297	3.2e-11	1.03e-07	up	RBM20	RNA-binding protein 20 isoform X1
Thigh muscle	ncbi_418845	2.78294	4.87e-11	1.25e-07	up	SLC25A30	kidney mitochondrial carrier protein 1 isoform X1
Thigh muscle	ncbi_415669	-3.34075	6.39e-11	1.37e-07	down	TPPP3	tubulin polymerization-promoting protein family member 3
Thigh muscle	ncbi_693255	2.3983	8.78e-11	1.46e-07	up	GADD45A	growth arrest and DNA damage-inducible protein GADD45 alpha
Thigh muscle	ncbi_100857134	3.70292	9.09e-11	1.46e-07	up	GADL1	acidic amino acid decarboxylase GADL1 isoform X1
Thigh muscle	ncbi_420642	-2.51789	2.13e-09	3.04e-06	down	GALNT15	polypeptide N-acetylgalactosaminyltransferase 15 isoform X1
Thigh muscle	ncbi_107053650	2.14024	3.94e-09	5.06e-06	up	DDIT4	DNA damage-inducible transcript 4 protein
Thigh muscle	ncbi_770936	3.49267	4.81e-09	5.21e-06	up	LOC770936	SRSF protein kinase 3-like
Thigh muscle	ncbi_422569	7.44616	4.87e-09	5.21e-06	up	GPM6A	neuronal membrane glycoprotein M6-a
Thigh muscle	ncbi_423136	-1.73117	7.92e-09	7.61e-06	down	TNKS1BP1	182 kDa tankyrase-1-binding protein isoform X1
Thigh muscle	MSTRG.3006	-4.39959	8.3e-09	7.61e-06	down	--	RNA-binding protein 33 isoform X6 [Gallus gallus]
Thigh muscle	ncbi_107049075	3.81223	1.26e-08	1.07e-05	up	LOC107049075	dnaJ homolog subfamily B member 1
Thigh muscle	ncbi_428805	5.46503	1.63e-08	1.31e-05	up	FBXO41	F-box only protein 41
Thigh muscle	ncbi_427507	-2.45457	2.44e-08	1.84e-05	down	AGBL1	cytosolic carboxypeptidase 4 isoform X1
Thigh muscle	ncbi_112530395	1.9835	3.2e-08	2.28e-05	up	FAM117A	protein FAM117A isoform X1
Thigh muscle	ncbi_419873	1.93609	4.35e-08	2.82e-05	up	PPM1J	protein phosphatase 1J
Thigh muscle	ncbi_420299	2.41919	4.44e-08	2.82e-05	up	RHPN1	rhophilin-1 isoform X1
Thigh muscle	ncbi_112531937	5.80209	4.62e-08	2.82e-05	up	LOC112531937	uncharacterized protein LOC112531937
Thigh muscle	ncbi_419592	2.02452	5.26e-08	3.07e-05	up	RSRP1	arginine/serine-rich protein 1
Thigh muscle	ncbi_416054	2.79526	6.18e-08	3.45e-05	up	KLHDC8B	kelch domain-containing protein 8B
Thigh muscle	ncbi_426126	2.18618	7.08e-08	3.78e-05	up	MTHFD2	bifunctional methylenetetrahydrofolate dehydrogenase/cyclohydrolase, mitochondrial
Thigh muscle	ncbi_423412	2.04632	7.87e-08	3.88e-05	up	TC2N	tandem C2 domains nuclear protein isoform X1
Thigh muscle	ncbi_100859435	2.56438	7.74e-08	3.88e-05	up	EN2	homeobox protein engrailed-2
Thigh muscle	ncbi_427985	4.5356	9.33e-08	4.43e-05	up	B3GALT5	beta-1,3-galactosyltransferase 5
Thigh muscle	ncbi_772006	-2.45718	1.21e-07	5.35e-05	down	FOXE3	forkhead box protein E3
Thigh muscle	ncbi_771328	-2.71861	1.21e-07	5.35e-05	down	TBX1	T-box transcription factor TBX1 isoform X1
Thigh muscle	MSTRG.1477	2.34477	1.47e-07	6.28e-05	up	FAM200B	general transcription factor II-I repeat domain-containing protein 2-like [Phyllostomus discolor]
Thigh muscle	MSTRG.12039	3.62822	1.65e-07	6.84e-05	up	--	hypothetical protein Anapl_14400, partial [Anas platyrhynchos]
Thigh muscle	ncbi_423075	-3.74993	1.81e-07	7.26e-05	down	OTOG	otogelin isoform X1
Thigh muscle	ncbi_430731	-2.65041	2.31e-07	8.96e-05	down	ZNF226L	zinc finger protein 501 isoform X1
Thigh muscle	ncbi_422943	-1.72687	2.38e-07	8.96e-05	down	SLC4A11	sodium bicarbonate transporter-like protein 11 isoform X1
Thigh muscle	ncbi_374080	1.66064	2.61e-07	9.57e-05	up	TLE4Z1	transducin-like enhancer protein 4 isoform X1
Thigh muscle	ncbi_417440	-2.05291	3.02e-07	0.000107626	down	ABCA8	ATP-binding cassette sub-family A member 10
Thigh muscle	ncbi_415833	-1.80528	3.26e-07	0.000112938	down	CA5A	carbonic anhydrase 5A, mitochondrial isoform X1
Thigh muscle	ncbi_100857889	2.80398	3.58e-07	0.000120748	up	PLCXD3	PI-PLC X domain-containing protein 3
Thigh muscle	ncbi_396106	-1.95375	5.07e-07	0.000166875	down	TNX	tenascin-X isoform X1
Thigh muscle	ncbi_421775	2.00989	5.83e-07	0.000187071	up	SOBP	sine oculis-binding protein homolog isoform X1
Thigh muscle	ncbi_417686	3.4843	7.57e-07	0.00022575	up	TEKT1	tektin-1 isoform X1
Thigh muscle	MSTRG.22809	4.15149	7.29e-07	0.00022575	up	--	rna-directed dna polymerase from mobile element jockey-like [Limosa lapponica baueri]
Thigh muscle	MSTRG.22634	6.66528	7.49e-07	0.00022575	up	--	-
Thigh muscle	ncbi_374111	2.10386	8.25e-07	0.000240461	up	CELF2	CUGBP Elav-like family member 2
Thigh muscle	MSTRG.248	2.32328	8.45e-07	0.00024083	up	--	rna-directed dna polymerase from mobile element jockey-like [Limosa lapponica baueri]
Thigh muscle	ncbi_421414	2.33761	9.37e-07	0.000261145	up	TTC7A	tetratricopeptide repeat protein 7A isoform X1
Thigh muscle	ncbi_421457	1.5081	1.09e-06	0.000297084	up	ZNF318	zinc finger protein 318
Thigh muscle	ncbi_768482	2.09975	1.15e-06	0.000307785	up	NIM1KZ	serine/threonine-protein kinase NIM1 isoform X1
Thigh muscle	ncbi_395986	1.90562	1.25e-06	0.000327008	up	RAPSN	43 kDa receptor-associated protein of the synapse isoform X1
Thigh muscle	ncbi_112531154	-3.90645	1.42e-06	0.000364127	down	LOC112531154	uncharacterized protein LOC112531154
Thigh muscle	ncbi_771509	-1.96558	1.78e-06	0.000446596	down	CDC42EP4	cdc42 effector protein 4 isoform X1
Thigh muscle	MSTRG.10920	2.90921	1.84e-06	0.00045293	up	--	-
Thigh muscle	ncbi_426340	1.8044	2.43e-06	0.000588833	up	TAPBPL	tapasin-related protein
Thigh muscle	ncbi_107054090	2.79859	2.89e-06	0.000686858	up	LOC107054090	uncharacterized protein LOC107054090
Thigh muscle	ncbi_395862	-3.34201	3.1e-06	0.00072408	down	PITX2	pituitary homeobox 2
Thigh muscle	ncbi_418670	-1.34339	3.5e-06	0.000786476	down	PPP2R3B	serine/threonine-protein phosphatase 2A regulatory subunit B'' subunit beta isoform X1
Thigh muscle	ncbi_415407	2.4106	3.56e-06	0.000786476	up	PRTG	protogenin precursor
Thigh muscle	ncbi_419054	-2.50398	3.46e-06	0.000786476	down	CHRDL2	chordin-like protein 2 isoform X1
Thigh muscle	ncbi_427957	-3.23641	3.88e-06	0.0008435	down	SLC19A2	thiamine transporter 1
Thigh muscle	ncbi_418310	2.24363	4.03e-06	0.000846766	up	STYK1	tyrosine-protein kinase STYK1
Thigh muscle	ncbi_395612	2.30455	4.02e-06	0.000846766	up	GSTA4L	glutathione S-transferase alpha 4-like isoform X1
Thigh muscle	ncbi_414136	1.51897	4.77e-06	0.000971442	up	HSPB2	heat shock protein beta-2 isoform X1
Thigh muscle	ncbi_428432	-2.19305	4.75e-06	0.000971442	down	OSBPL3	oxysterol-binding protein-related protein 3 isoform X1
Thigh muscle	ncbi_419422	2.73783	5.09e-06	0.00101967	up	FAM132A	adipolin
Thigh muscle	ncbi_423881	-2.22087	5.32e-06	0.00104904	down	GSTO1	glutathione S-transferase omega-1
Thigh muscle	ncbi_396536	-1.5788	5.44e-06	0.0010573	down	APOA1	apolipoprotein A-I preproprotein
Thigh muscle	ncbi_416986	1.37938	5.97e-06	0.00114287	up	PRKAB1	5'-AMP-activated protein kinase subunit beta-1 isoform X1
Thigh muscle	ncbi_422857	-2.51808	6.38e-06	0.0012033	down	WFS1	wolframin
Thigh muscle	ncbi_423144	-1.30086	6.78e-06	0.00124251	down	ANO1	anoctamin-1 isoform X1
Thigh muscle	ncbi_421043	-2.64572	6.77e-06	0.00124251	down	CEP192	centrosomal protein of 192 kDa isoform X1
Thigh muscle	ncbi_396188	1.94717	9.57e-06	0.00172974	up	HSP90AB1	heat shock cognate protein HSP 90-beta
Thigh muscle	ncbi_427587	2.58193	1.32e-05	0.00234384	up	KBTBD12	kelch repeat and BTB domain-containing protein 12
Thigh muscle	ncbi_427864	-1.2827	1.44e-05	0.00253612	down	DYRK2	dual specificity tyrosine-phosphorylation-regulated kinase 2 isoform X1
Thigh muscle	ncbi_769909	-1.30862	1.48e-05	0.0025655	down	TNFRSF11A	tumor necrosis factor receptor superfamily member 11A isoform X1
Thigh muscle	ncbi_107049115	-1.77423	1.62e-05	0.0027775	down	LOC107049115	uncharacterized protein LOC107049115 isoform X1
Thigh muscle	ncbi_417527	1.51965	1.65e-05	0.00278537	up	UNC45B	protein unc-45 homolog B
Thigh muscle	ncbi_421192	1.29141	1.74e-05	0.00290112	up	XPO1	exportin-1
Thigh muscle	ncbi_107050833	2.63333	1.77e-05	0.00290744	up	LOC107050833	class I histocompatibility antigen, F10 alpha chain-like isoform X1
Thigh muscle	ncbi_415830	2.27225	1.81e-05	0.00293186	up	JPH3	junctophilin-3
Thigh muscle	MSTRG.1100	-3.50038	1.95e-05	0.00312321	down	--	rna-directed dna polymerase from mobile element jockey-like [Limosa lapponica baueri]
Thigh muscle	MSTRG.3010	-4.10426	1.99e-05	0.00315452	down	--	-
Thigh muscle	ncbi_395351	2.26173	2.18e-05	0.00341629	up	DPF3	zinc finger protein DPF3 isoform X1
Thigh muscle	ncbi_107054848	2.82706	2.39e-05	0.00369258	up	LOC107054848	uncharacterized protein LOC107054848
Thigh muscle	ncbi_417815	-2.37161	2.44e-05	0.0037321	down	SLC16A7	monocarboxylate transporter 2 isoform X1
Thigh muscle	ncbi_420894	3.15256	2.54e-05	0.00383084	up	SERPINB1	leukocyte elastase inhibitor
Thigh muscle	MSTRG.13796	2.62082	2.72e-05	0.00405718	up	--	-
Thigh muscle	ncbi_428569	2.24211	2.79e-05	0.00411447	up	SLC3A1	neutral and basic amino acid transport protein rBAT
Thigh muscle	ncbi_107049095	-2.15819	2.83e-05	0.00412663	down	LOC107049095	zinc finger protein 501-like isoform X1
Thigh muscle	ncbi_426549	-1.92702	2.96e-05	0.00427017	down	RETSAT	all-trans-retinol 13,14-reductase
Thigh muscle	ncbi_431663	1.40959	3.1e-05	0.00441633	up	NPR3	atrial natriuretic peptide receptor 3 isoform X1
Thigh muscle	ncbi_419821	-2.56914	3.18e-05	0.00444048	down	PLEKHA6	pleckstrin homology domain-containing family A member 6 isoform X11
Thigh muscle	ncbi_421415	2.84314	3.17e-05	0.00444048	up	LOC421415	uncharacterized protein LOC421415
Thigh muscle	ncbi_420639	1.53854	3.36e-05	0.00463034	up	BTD	biotinidase
Thigh muscle	ncbi_421833	1.75888	3.57e-05	0.00487202	up	NT5E	5'-nucleotidase
Thigh muscle	ncbi_426962	-2.54637	3.61e-05	0.0048753	down	GFPT2	glutamine--fructose-6-phosphate aminotransferase [isomerizing] 2 isoform X1
Thigh muscle	ncbi_416445	1.33795	3.74e-05	0.00498839	up	FAM20C	extracellular serine/threonine protein kinase FAM20C
Thigh muscle	ncbi_418542	1.40632	3.82e-05	0.00498839	up	PKNOX1	homeobox protein PKNOX1 isoform X1
Thigh muscle	ncbi_416803	-1.65884	3.85e-05	0.00498839	down	ADGRD1	adhesion G-protein coupled receptor D1 isoform X1
Thigh muscle	ncbi_422166	-2.78259	3.83e-05	0.00498839	down	EDA2R	tumor necrosis factor receptor superfamily member 27
Thigh muscle	ncbi_426627	-2.16172	4.16e-05	0.00529842	down	SH3TC2	LOW QUALITY PROTEIN: SH3 domain and tetratricopeptide repeat-containing protein 2
Thigh muscle	ncbi_101749229	2.26308	4.17e-05	0.00529842	up	PLA2G4B	cytosolic phospholipase A2 beta isoform X1
Thigh muscle	ncbi_418324	-1.39387	4.28e-05	0.00538371	down	CTC1	CST complex subunit CTC1 isoform X1
Thigh muscle	ncbi_420092	-2.56775	4.39e-05	0.00546873	down	RFX2	DNA-binding protein RFX2 isoform X1
Thigh muscle	ncbi_769141	1.19014	4.5e-05	0.00554982	up	MICU1	calcium uptake protein 1, mitochondrial isoform X1
Thigh muscle	ncbi_419017	-1.54696	4.98e-05	0.00591717	down	PRSS23	serine protease 23
Thigh muscle	ncbi_423429	-1.67521	4.93e-05	0.00591717	down	DDX24	ATP-dependent RNA helicase DDX24 isoform X1
Thigh muscle	ncbi_418351	-1.82437	4.98e-05	0.00591717	down	QTRT2	queuine tRNA-ribosyltransferase accessory subunit 2
Thigh muscle	ncbi_100857728	-2.20097	4.86e-05	0.00591717	down	SHE	SH2 domain-containing adapter protein E
Thigh muscle	ncbi_107057170	-2.06131	5.17e-05	0.00608986	down	LOC107057170	nitric oxide synthase, endothelial
Thigh muscle	ncbi_419087	-1.93877	5.61e-05	0.00654381	down	ACER3	alkaline ceramidase 3 isoform X1
Thigh muscle	ncbi_420827	1.39759	5.83e-05	0.00669766	up	RNF144B	E3 ubiquitin-protein ligase RNF144B isoform X1
Thigh muscle	ncbi_101752029	-2.15684	5.9e-05	0.00669766	down	THBD	thrombomodulin
Thigh muscle	ncbi_396417	-5.65526	5.86e-05	0.00669766	down	BG2	intestinal zipper protein
Thigh muscle	ncbi_404271	-1.84705	5.99e-05	0.00673509	down	ANXA1	annexin A1 isoform X1
Thigh muscle	ncbi_769202	1.22683	6.54e-05	0.00709952	up	PIK3R6	phosphoinositide 3-kinase regulatory subunit 6 isoform X1
Thigh muscle	ncbi_419600	1.30271	6.51e-05	0.00709952	up	SRSF4	serine/arginine-rich splicing factor 4 isoform X1
Thigh muscle	ncbi_776031	-1.52258	6.46e-05	0.00709952	down	ANGPTL2	angiopoietin-related protein 2 precursor
Thigh muscle	MSTRG.24692	1.90707	6.59e-05	0.00709952	up	MYLPF	RecName: Full=Myosin regulatory light chain 2, skeletal muscle isoform; AltName: Full=DTNB; AltName: Full=Fast skeletal myosin light chain 2; Short=MLC-2; AltName: Full=G2; AltName: Full=LC2f [Gallus gallus]
Thigh muscle	ncbi_374201	-2.68207	6.58e-05	0.00709952	down	PITX1	pituitary homeobox 1
Thigh muscle	ncbi_419785	-1.11869	7.02e-05	0.00745568	down	BCL9L	B-cell CLL/lymphoma 9-like protein
Thigh muscle	ncbi_431414	-1.90405	7.03e-05	0.00745568	down	LBX2	transcription factor LBX2
Thigh muscle	ncbi_423397	-2.95067	7.31e-05	0.00768555	down	SPATA7	spermatogenesis-associated protein 7 isoform X1
Thigh muscle	ncbi_425372	-1.49639	7.79e-05	0.00812211	down	FREM3	chondroitin sulfate proteoglycan 4
Thigh muscle	ncbi_770302	1.89048	8.25e-05	0.00846459	up	UCHL1	ubiquitin carboxyl-terminal hydrolase isozyme L1 isoform X1
Thigh muscle	ncbi_418589	-2.75356	8.19e-05	0.00846459	down	GK	glycerol kinase isoform X1
Thigh muscle	ncbi_396005	-1.10511	8.57e-05	0.00865534	down	TSC22D1	TSC22 domain family protein 1 isoform X1
Thigh muscle	MSTRG.6935	-2.62452	8.5e-05	0.00865534	down	--	rna-directed dna polymerase from mobile element jockey-like [Limosa lapponica baueri]
Thigh muscle	ncbi_418297	-1.21031	9.11e-05	0.00912617	down	CLSTN3	calsyntenin-3
Thigh muscle	ncbi_374242	-1.70147	9.25e-05	0.00919607	down	DCX	neuronal migration protein doublecortin isoform X1
Thigh muscle	ncbi_395507	-1.51588	9.4e-05	0.00927043	down	P2RX5	P2X purinoceptor 5 isoform X1
Thigh muscle	ncbi_418166	1.46758	0.00010092	0.00980687	up	TUBA8A	tubulin alpha-4 chain
Thigh muscle	ncbi_417685	2.32842	0.000100533	0.00980687	up	FAM64A	uncharacterized protein FAM64A
Thigh muscle	ncbi_420980	-1.54516	0.000113646	0.0109604	down	ELP2	elongator complex protein 2 isoform X1
Thigh muscle	MSTRG.13620	-2.69735	0.000116494	0.0111513	down	--	Kelch domain-containing protein 8B, partial [Opisthocomus hoazin]
Thigh muscle	MSTRG.7983	-1.57552	0.000122332	0.0115186	down	HADHB	trifunctional enzyme subunit beta, mitochondrial isoform X1 [Meleagris gallopavo]
Thigh muscle	ncbi_416431	-1.76785	0.000122001	0.0115186	down	USP42	ubiquitin carboxyl-terminal hydrolase 42
Thigh muscle	ncbi_107050773	1.98365	0.000123026	0.0115186	up	LOC107050773	calsequestrin-1
Thigh muscle	ncbi_769198	-1.40627	0.000128973	0.0117688	down	PLEKHO2	pleckstrin homology domain-containing family O member 2 isoform X1
Thigh muscle	ncbi_416274	-1.43586	0.000132121	0.0117688	down	NDST1	bifunctional heparan sulfate N-deacetylase/N-sulfotransferase 1 isoform X1
Thigh muscle	ncbi_422776	1.4776	0.0001313	0.0117688	up	ATP8A1	phospholipid-transporting ATPase IA isoform X2
Thigh muscle	ncbi_100857796	1.48012	0.00012821	0.0117688	up	HEXIM1	protein HEXIM1
Thigh muscle	ncbi_418884	-1.60351	0.000130074	0.0117688	down	THSD1	thrombospondin type-1 domain-containing protein 1 isoform X1
Thigh muscle	ncbi_770081	-1.66475	0.000129508	0.0117688	down	EPS8L2	epidermal growth factor receptor kinase substrate 8-like protein 2
Thigh muscle	ncbi_419366	1.67	0.00013053	0.0117688	up	PER3	period circadian protein homolog 3
Thigh muscle	ncbi_101750341	1.8226	0.000135713	0.0120054	up	LOC101750341	nucleolar protein 58-like
Thigh muscle	ncbi_770734	-2.83923	0.00013779	0.0121057	down	PRODH	proline dehydrogenase 1, mitochondrial
Thigh muscle	MSTRG.1225	1.80922	0.000139765	0.0121957	up	AKR1E2	Aldose reductase [Ophiophagus hannah]
Thigh muscle	ncbi_768599	-1.73193	0.000141125	0.0122312	down	ASAP2	arf-GAP with SH3 domain, ANK repeat and PH domain-containing protein 2 isoform X1
Thigh muscle	ncbi_100857587	-1.18543	0.000146202	0.0125371	down	DAPK2	death-associated protein kinase 2 isoform X1
Thigh muscle	ncbi_423638	-1.35737	0.00014661	0.0125371	down	ECD	protein ecdysoneless homolog
Thigh muscle	ncbi_428842	-1.63879	0.000151812	0.0127936	down	OLFML1	olfactomedin-like protein 1 isoform X1
Thigh muscle	ncbi_428328	1.73828	0.000154832	0.0127936	up	ATP8B3	phospholipid-transporting ATPase IK isoform X1
Thigh muscle	ncbi_420984	-1.76587	0.000152952	0.0127936	down	SLC39A6	zinc transporter ZIP6
Thigh muscle	ncbi_424016	1.96544	0.000154421	0.0127936	up	RAMP1	receptor activity-modifying protein 1
Thigh muscle	ncbi_771061	-1.97415	0.000155594	0.0127936	down	SCARA5	scavenger receptor class A member 5 isoform X1
Thigh muscle	ncbi_427821	2.28312	0.000155447	0.0127936	up	GAS2L2	GAS2-like protein 2
Thigh muscle	ncbi_419046	1.8806	0.000167388	0.0135892	up	KLHL42	kelch-like protein 42
Thigh muscle	ncbi_422313	1.96881	0.000166877	0.0135892	up	ASB12	ankyrin repeat and SOCS box protein 12 isoform X1
Thigh muscle	ncbi_100859853	2.18499	0.000169159	0.0136466	up	GADD45B	growth arrest and DNA damage-inducible protein GADD45 beta
Thigh muscle	ncbi_100859263	1.43316	0.000172422	0.013737	up	SGCA	alpha-sarcoglycan isoform X1
Thigh muscle	ncbi_100857615	-5.39867	0.000172009	0.013737	down	LOC100857615	platelet glycoprotein VI isoform X2
Thigh muscle	ncbi_112532617	2.34929	0.000174283	0.0137995	up	LOC112532617	uncharacterized protein LOC112532617
Thigh muscle	ncbi_418561	-1.98792	0.000179793	0.0140412	down	MAOB	amine oxidase [flavin-containing] B
Thigh muscle	ncbi_419088	-2.01612	0.000180574	0.0140412	down	TSKU	tsukushin precursor
Thigh muscle	ncbi_107054425	5.6471	0.000180619	0.0140412	up	LOC107054425	epidermal differentiation-specific protein-like
Thigh muscle	MSTRG.2212	-2.75464	0.000183189	0.014115	down	--	Ubinuclein-2, partial [Eudyptula albosignata]
Thigh muscle	ncbi_396137	3.64605	0.000183769	0.014115	up	GRIA4	glutamate receptor 4 isoform X1
Thigh muscle	MSTRG.5946	1.46905	0.000188013	0.0142701	up	--	reverse transcriptase, partial [Gallus gallus]
Thigh muscle	ncbi_417603	-1.64767	0.00018716	0.0142701	down	TRPV2	transient receptor potential cation channel subfamily V member 2 isoform X1
Thigh muscle	ncbi_417193	-2.65536	0.000189446	0.0142943	down	PTGES	prostaglandin E synthase isoform X1
Thigh muscle	ncbi_417785	-1.31874	0.000201386	0.0151063	down	PNPLA8	calcium-independent phospholipase A2-gamma isoform X1
Thigh muscle	ncbi_101747587	1.96194	0.000206131	0.0153723	up	UBB	polyubiquitin-B
Thigh muscle	ncbi_422547	-1.3174	0.00020871	0.0154367	down	ACSL1	long-chain-fatty-acid--CoA ligase 1 isoform X1
Thigh muscle	ncbi_419009	1.8264	0.000209401	0.0154367	up	CHORDC1	cysteine and histidine-rich domain-containing protein 1
Thigh muscle	ncbi_422457	-1.59978	0.000213172	0.0155361	down	SMARCA5	SWI/SNF-related matrix-associated actin-dependent regulator of chromatin subfamily A member 5 isoform X1
Thigh muscle	ncbi_101748816	2.90315	0.000211983	0.0155361	up	TMPRSS11D	transmembrane protease serine 11E
Thigh muscle	ncbi_420658	-1.55914	0.00021915	0.0158816	down	SLC4A7	sodium bicarbonate cotransporter 3 isoform X4
Thigh muscle	ncbi_415715	-1.13715	0.000226298	0.0162361	down	SLC12A4	solute carrier family 12 member 4 isoform X1
Thigh muscle	ncbi_395963	-1.88238	0.000226574	0.0162361	down	CAPN2	calpain-2 catalytic subunit precursor
Thigh muscle	ncbi_416569	1.30986	0.00022961	0.0163623	up	RBBP6	E3 ubiquitin-protein ligase RBBP6 isoform X1
Thigh muscle	ncbi_423821	-1.69559	0.000232405	0.0163795	down	CCNJ	cyclin-J isoform X1
Thigh muscle	ncbi_396353	1.90604	0.000231662	0.0163795	up	NREP	neuronal regeneration-related protein
Thigh muscle	MSTRG.7723	2.80661	0.000239098	0.0167591	up	SCRIB	protein scribble homolog isoform X1 [Coturnix japonica]
Thigh muscle	ncbi_425527	1.06837	0.0002411	0.0168075	up	DUSP3	dual specificity protein phosphatase 3
Thigh muscle	ncbi_423068	1.53613	0.000250428	0.0173052	up	SOX6	transcription factor SOX-6 isoform X1
Thigh muscle	MSTRG.4633	-2.39937	0.000250936	0.0173052	down	--	reverse transcriptase, partial [Gallus gallus]
Thigh muscle	ncbi_420991	-1.17244	0.000263307	0.017929	down	MSANTD3	myb/SANT-like DNA-binding domain-containing protein 3
Thigh muscle	ncbi_396465	-2.51445	0.000264175	0.017929	down	MYH10	myosin-10 isoform X1
Thigh muscle	ncbi_420896	-4.24812	0.000261764	0.017929	down	SERPINB2	serpin B10
Thigh muscle	ncbi_417992	1.01019	0.000269129	0.0181044	up	TOB2	protein Tob2
Thigh muscle	ncbi_100858920	1.56616	0.000269582	0.0181044	up	SYPL2	synaptophysin-like protein 2
Thigh muscle	ncbi_416318	-1.79289	0.000279615	0.0186803	down	PPP2CA	serine/threonine-protein phosphatase 2A catalytic subunit alpha isoform
Thigh muscle	ncbi_422478	-1.12123	0.000288348	0.0188906	down	SH3D19	SH3 domain-containing protein 19 isoform X1
Thigh muscle	ncbi_408051	-1.31859	0.000288653	0.0188906	down	PCDHGC3	protocadherin gamma-C3 precursor
Thigh muscle	ncbi_101747696	-1.57062	0.000285233	0.0188906	down	CRIP1	cysteine-rich protein 1 (intestinal)
Thigh muscle	ncbi_421507	2.36428	0.000286009	0.0188906	up	GREM2	gremlin-2 isoform X1
Thigh muscle	ncbi_395509	-1.37278	0.000293398	0.0191036	down	PDGFRA	platelet-derived growth factor receptor alpha isoform X1
Thigh muscle	ncbi_421217	1.13308	0.000301291	0.0192272	up	ACYP2	acylphosphatase-2
Thigh muscle	ncbi_100859397	1.34563	0.000300917	0.0192272	up	TRIOBP	LOW QUALITY PROTEIN: TRIO and F-actin-binding protein
Thigh muscle	ncbi_417954	-1.61136	0.000300776	0.0192272	down	HIST1H101	histone H1.01
Thigh muscle	ncbi_424241	-1.90235	0.000298911	0.0192272	down	ARHGEF1	uncharacterized protein ARHGEF1 isoform X1
Thigh muscle	ncbi_417093	1.29433	0.000309128	0.0193064	up	PBX3	pre-B-cell leukemia transcription factor 3
Thigh muscle	ncbi_373996	-1.30525	0.000306634	0.0193064	down	CAV1	caveolin-1
Thigh muscle	ncbi_419346	-1.41813	0.000309742	0.0193064	down	NFATC2	nuclear factor of activated T-cells, cytoplasmic 2 isoform X1
Thigh muscle	ncbi_100499189	-1.63764	0.000312837	0.0193064	down	CSF1	macrophage colony-stimulating factor 1 isoform X1
Thigh muscle	ncbi_417013	-1.68837	0.000313068	0.0193064	down	LOC417013	acyl-CoA dehydrogenase family member 11
Thigh muscle	ncbi_395830	1.73509	0.000311748	0.0193064	up	PON2	serum paraoxonase/arylesterase 2 precursor
Thigh muscle	ncbi_771119	2.02241	0.000307143	0.0193064	up	PRR33	proline-rich protein 33
Thigh muscle	ncbi_429108	-1.49817	0.000317414	0.0193911	down	ACOT11	acyl-coenzyme A thioesterase 11 isoform X1
Thigh muscle	ncbi_417747	-1.53036	0.000318977	0.0193911	down	ZNF800	zinc finger protein 800 isoform X1
Thigh muscle	ncbi_424494	-1.53217	0.000317755	0.0193911	down	BCAR3	breast cancer anti-estrogen resistance protein 3 isoform X1
Thigh muscle	ncbi_420893	1.51625	0.00032073	0.0194057	up	MYLK4	myosin light chain kinase family member 4 isoform X1
Thigh muscle	ncbi_417241	-1.67399	0.000326651	0.0196711	down	TLR4	toll-like receptor 4 precursor
Thigh muscle	ncbi_415774	1.31535	0.000334089	0.0200251	up	SLC7A10	asc-type amino acid transporter 1 isoform X1
Thigh muscle	ncbi_107050834	1.40073	0.000339176	0.0201127	up	UBE2S	ubiquitin-conjugating enzyme E2 S
Thigh muscle	ncbi_420104	-1.43686	0.000340255	0.0201127	down	SBNO2	protein strawberry notch homolog 2 isoform X1
Thigh muscle	ncbi_107052602	2.54616	0.000338089	0.0201127	up	LOC107052602	uncharacterized protein LOC107052602
Thigh muscle	ncbi_419818	-2.52311	0.000342056	0.0201264	down	PI16	peptidase inhibitor 16 isoform X1
Thigh muscle	ncbi_396394	-1.77236	0.0003513	0.0205759	down	PLA2G4A	cytosolic phospholipase A2 isoform X1
Thigh muscle	ncbi_422350	-1.25414	0.000354392	0.0206627	down	COL4A6	collagen alpha-6(IV) chain isoform X1
Thigh muscle	ncbi_769454	1.31348	0.000358197	0.02079	up	MSS51	putative protein MSS51 homolog, mitochondrial
Thigh muscle	ncbi_422782	2.43198	0.000360549	0.0208323	up	NSUN7	putative methyltransferase NSUN7 isoform X1
Thigh muscle	ncbi_421534	1.12149	0.00036868	0.0210275	up	ACTA1	actin, alpha skeletal muscle isoform X1
Thigh muscle	ncbi_374044	-1.54114	0.000368846	0.0210275	down	HK2	hexokinase-2
Thigh muscle	ncbi_101749540	-4.55608	0.000368445	0.0210275	down	LOC101749540	small integral membrane protein 32
Thigh muscle	ncbi_424370	3.54421	0.000380149	0.021576	up	C8H1ORF111	spermatogenesis-associated protein 46 isoform X1
Thigh muscle	ncbi_107054877	1.4095	0.000393386	0.0220578	up	LOC107054877	LOW QUALITY PROTEIN: junctophilin-2
Thigh muscle	ncbi_416297	-1.48626	0.000393413	0.0220578	down	FAM13B	family with sequence similarity 13, member B
Thigh muscle	MSTRG.13987	3.00519	0.000393798	0.0220578	up	--	-
Thigh muscle	ncbi_423668	-1.77887	0.000399979	0.0221143	down	RSFR	ribonuclease homolog precursor
Thigh muscle	ncbi_430981	3.00766	0.000396576	0.0221143	up	GABRR3	gamma-aminobutyric acid receptor subunit rho-3
Thigh muscle	ncbi_427017	1.08894	0.000404955	0.0222934	up	PRKAB2	5'-AMP-activated protein kinase subunit beta-2 isoform X1
Thigh muscle	ncbi_395170	2.1343	0.00040903	0.0224215	up	RGS9BP	regulator of G-protein signaling 9-binding protein
Thigh muscle	ncbi_422496	1.92037	0.000417047	0.0227637	up	HSPA4L	heat shock 70 kDa protein 4L
Thigh muscle	ncbi_396513	-1.39233	0.000426315	0.0229886	down	EPHB2	ephrin type-B receptor 2 isoform X1
Thigh muscle	ncbi_425789	-1.5825	0.00042484	0.0229886	down	CIRBP	cold-inducible RNA-binding protein isoform X1
Thigh muscle	ncbi_421058	-1.62376	0.000426544	0.0229886	down	EMILIN2	EMILIN-2 isoform X1
Thigh muscle	ncbi_416204	-1.18456	0.000435102	0.0232544	down	STK10	serine/threonine-protein kinase 10
Thigh muscle	ncbi_395454	-1.77373	0.000434641	0.0232544	down	PCSK6	proprotein convertase subtilisin/kexin type 6 isoform X1
Thigh muscle	ncbi_396470	1.51429	0.000442306	0.0235413	up	MYL1	myosin light chain 1, skeletal muscle isoform isoform X1
Thigh muscle	ncbi_416036	-1.98878	0.000447421	0.0237151	down	NTN4L	netrin-4
Thigh muscle	ncbi_429158	-1.48522	0.000451254	0.0238199	down	NCEH1	neutral cholesterol ester hydrolase 1
Thigh muscle	ncbi_420923	-1.22862	0.000453947	0.0238639	down	DAP	death-associated protein 1
Thigh muscle	ncbi_107051134	1.52338	0.000461382	0.0241557	up	LOC107051134	LOW QUALITY PROTEIN: creatine kinase M-type-like
Thigh muscle	ncbi_423932	-1.4448	0.0004654	0.0241688	down	INPP5F	phosphatidylinositide phosphatase SAC2 isoform X1
Thigh muscle	ncbi_776274	-3.14239	0.000464199	0.0241688	down	CASP14	uncharacterized protein LOC776274 isoform X1
Thigh muscle	ncbi_428435	-1.15249	0.000469157	0.0242657	down	CREB5	cyclic AMP-responsive element-binding protein 5 isoform X1
Thigh muscle	ncbi_396529	-2.13075	0.000482947	0.0248786	down	ATP1B1	sodium/potassium-transporting ATPase subunit beta-1
Thigh muscle	ncbi_427293	-1.18965	0.000490243	0.0251534	down	TMEM175	endosomal/lysosomal potassium channel TMEM175
Thigh muscle	ncbi_107050002	1.26445	0.000494594	0.0251846	up	POLR3D	LOW QUALITY PROTEIN: DNA-directed RNA polymerase III subunit RPC4
Thigh muscle	ncbi_430557	-1.32656	0.000495076	0.0251846	down	ACACB	LOW QUALITY PROTEIN: acetyl-CoA carboxylase 2
Thigh muscle	ncbi_112532898	-3.64734	0.000496742	0.0251846	down	LOC112532898	uncharacterized protein LOC112532898
Thigh muscle	ncbi_107050177	1.20746	0.000500536	0.025277	up	LOC107050177	dr1-associated corepressor isoform X1
Thigh muscle	ncbi_101751709	1.00302	0.000515387	0.025424	up	H2A2BL	histone H2A type 2-B
Thigh muscle	ncbi_374067	1.21647	0.000510748	0.025424	up	PKNOX2	homeobox protein PKNOX2 isoform X1
Thigh muscle	ncbi_418898	-1.42201	0.000517035	0.025424	down	ALG5	dolichyl-phosphate beta-glucosyltransferase
Thigh muscle	ncbi_422263	-1.6166	0.00051732	0.025424	down	PCDH19	protocadherin-19 isoform X1
Thigh muscle	ncbi_422809	-2.04303	0.000512382	0.025424	down	LGI2	leucine-rich repeat LGI family member 2 precursor
Thigh muscle	ncbi_776144	-2.04434	0.000515702	0.025424	down	PPP1R36	protein phosphatase 1 regulatory subunit 36 isoform X1
Thigh muscle	ncbi_422241	-1.21765	0.000531543	0.0256675	down	SLC9A6	sodium/hydrogen exchanger 6
Thigh muscle	ncbi_107055040	-1.23325	0.00053228	0.0256675	down	ROBO4	roundabout homolog 4 isoform X1
Thigh muscle	ncbi_415886	1.2537	0.000531765	0.0256675	up	ADAT1	tRNA-specific adenosine deaminase 1 isoform X1
Thigh muscle	ncbi_423955	1.5999	0.000525491	0.0256675	up	METTL10	EEF1A lysine methyltransferase 2
Thigh muscle	ncbi_415505	-1.72518	0.000530085	0.0256675	down	FAM174B	membrane protein FAM174B
Thigh muscle	ncbi_396426	8.23751	0.000535465	0.0257244	up	TUBA8B	tubulin alpha-2 chain
Thigh muscle	ncbi_768091	1.08174	0.000541226	0.0259041	up	TSC22D3	TSC22 domain family protein 3 isoform X1
Thigh muscle	ncbi_395870	1.19257	0.000553761	0.0261906	up	RAC3	ras-related C3 botulinum toxin substrate 3
Thigh muscle	ncbi_107050760	1.28732	0.000555378	0.0261906	up	LOC107050760	SH3 and cysteine-rich domain-containing protein 3
Thigh muscle	ncbi_426871	2.09917	0.000551742	0.0261906	up	METTL7A	methyltransferase-like protein 7A
Thigh muscle	MSTRG.3020	4.73417	0.000554637	0.0261906	up	--	-
Thigh muscle	ncbi_424850	1.17972	0.000579282	0.0271184	up	ILKAP	integrin-linked kinase-associated serine/threonine phosphatase 2C
Thigh muscle	ncbi_421879	-1.46524	0.000587255	0.0273917	down	RAB23	ras-related protein Rab-23 isoform X1
Thigh muscle	ncbi_416117	-1.30262	0.000591908	0.0273971	down	VHL	von Hippel-Lindau disease tumor suppressor isoform X1
Thigh muscle	ncbi_429091	1.53731	0.000590756	0.0273971	up	MCOLN3	mucolipin-3 isoform X1
Thigh muscle	ncbi_420826	-1.61741	0.000593779	0.0273971	down	MBOAT1	lysophospholipid acyltransferase 1 isoform X1
Thigh muscle	ncbi_425261	3.13988	0.00059631	0.0274153	up	SLC4A5	electrogenic sodium bicarbonate cotransporter 4 isoform X1
Thigh muscle	ncbi_423747	-1.98051	0.000604506	0.0276928	down	ANXA7	annexin A7
Thigh muscle	ncbi_424014	1.46871	0.000607461	0.0277292	up	MT	putative methyltransferase DDB_G0268948
Thigh muscle	ncbi_426299	-1.76386	0.000615334	0.027989	down	MXD1	max dimerization protein 1 isoform X1
Thigh muscle	ncbi_417981	-1.31913	0.000632865	0.0281449	down	CYP2D6	cytochrome P450 2D49
Thigh muscle	ncbi_374105	1.39044	0.000638445	0.0281449	up	RIMBP2	RIMS-binding protein 2 isoform X1
Thigh muscle	ncbi_427678	1.58228	0.00063751	0.0281449	up	GRIN2A	glutamate receptor ionotropic, NMDA 2A isoform X1
Thigh muscle	ncbi_417543	1.65673	0.000631683	0.0281449	up	PHKG1	phosphorylase b kinase gamma catalytic chain, skeletal muscle/heart isoform isoform X1
Thigh muscle	ncbi_107049146	-1.78931	0.000627331	0.0281449	down	LOC107049146	gap junction gamma-1 protein-like
Thigh muscle	ncbi_422868	-2.10925	0.00063851	0.0281449	down	HTRA3	serine protease HTRA3
Thigh muscle	ncbi_386579	-2.14334	0.000625326	0.0281449	down	RPS6KA1L	ribosomal protein S6 kinase 2 alpha
Thigh muscle	ncbi_420776	-2.44591	0.000636782	0.0281449	down	BLVRA	biliverdin reductase A
Thigh muscle	ncbi_395766	1.37499	0.000644436	0.028293	up	USP2	ubiquitin carboxyl-terminal hydrolase 2 isoform X1
Thigh muscle	ncbi_395680	2.02006	0.000646282	0.028293	up	SMAD1	mothers against decapentaplegic homolog 1 isoform X1
Thigh muscle	ncbi_395547	1.74404	0.000648674	0.0283012	up	TMOD4	tropomodulin-4
Thigh muscle	ncbi_423479	1.10517	0.000661347	0.0287563	up	EIF5	eukaryotic translation initiation factor 5 isoform X1
Thigh muscle	ncbi_769893	-1.6915	0.000664887	0.0288125	down	BRAT1	BRCA1-associated ATM activator 1 isoform X1
Thigh muscle	ncbi_101747255	4.71208	0.000678379	0.0292982	up	LOC101747255	serologically defined colon cancer antigen 3 homolog
Thigh muscle	ncbi_420673	1.05068	0.000682669	0.0293846	up	ABHD5	1-acylglycerol-3-phosphate O-acyltransferase ABHD5
Thigh muscle	ncbi_415307	-1.30857	0.000688348	0.0294315	down	SIN3A	paired amphipathic helix protein Sin3a isoform X1
Thigh muscle	ncbi_427352	2.25879	0.000688032	0.0294315	up	SLC1A1	excitatory amino acid transporter 3
Thigh muscle	ncbi_424631	1.16565	0.000699406	0.0294909	up	RNF11	RING finger protein 11
Thigh muscle	ncbi_373964	1.4511	0.000696333	0.0294909	up	MSTN	growth/differentiation factor 8 precursor
Thigh muscle	ncbi_419220	1.58389	0.000693999	0.0294909	up	PPP1R3D	protein phosphatase 1 regulatory subunit 3D
Thigh muscle	ncbi_416895	2.54655	0.000701233	0.0294909	up	SVOP	synaptic vesicle 2-related protein
Thigh muscle	ncbi_771469	4.07813	0.000699731	0.0294909	up	ZBBX	zinc finger B-box domain-containing protein 1 isoform X1
Thigh muscle	ncbi_416512	1.1067	0.000706327	0.029608	up	GID4	glucose-induced degradation protein 4 homolog
Thigh muscle	ncbi_776775	1.86771	0.000717645	0.0299845	up	MYLPF	myosin regulatory light chain 2, skeletal muscle isoform
Thigh muscle	ncbi_395584	1.56499	0.000731382	0.0301707	up	SPRY2	protein sprouty homolog 2
Thigh muscle	ncbi_768350	1.85441	0.000730597	0.0301707	up	MHCIY	MHC-like class I Y isoform X3
Thigh muscle	ncbi_378912	2.14146	0.000731512	0.0301707	up	RGS2	regulator of G-protein signaling 2
Thigh muscle	ncbi_421579	-2.31964	0.000727896	0.0301707	down	MAP3K4	mitogen-activated protein kinase kinase kinase 4 isoform X1
Thigh muscle	ncbi_373917	-2.41297	0.000740563	0.0304462	down	LGALS3	galectin-3
Thigh muscle	ncbi_420138	-2.0346	0.000746777	0.0306035	down	CPAMD8	C3 and PZP-like alpha-2-macroglobulin domain-containing protein 8 isoform X1
Thigh muscle	ncbi_421585	1.17045	0.000773572	0.0316007	up	MRPL18	39S ribosomal protein L18, mitochondrial
Thigh muscle	MSTRG.12895	2.47557	0.000779401	0.0317377	up	--	uncharacterized protein LOC104695411 [Corvus cornix cornix]
Thigh muscle	MSTRG.6256	-1.8239	0.000782025	0.0317438	down	--	DNA-dependent protein kinase catalytic subunit, partial [Gallus gallus]
Thigh muscle	ncbi_415533	-1.10229	0.0007896	0.0319502	down	CILP	cartilage intermediate layer protein 1 isoform X1
Thigh muscle	ncbi_423708	1.3673	0.000803113	0.0323947	up	ANAPC16	anaphase-promoting complex subunit 16 isoform X3
Thigh muscle	ncbi_420309	-1.30177	0.000806213	0.0324178	down	DENND3	DENN domain-containing protein 3 isoform X1
Thigh muscle	ncbi_415372	1.40482	0.000817072	0.0326498	up	RPS27L	40S ribosomal protein S27-like
Thigh muscle	ncbi_418593	-1.45443	0.000815818	0.0326498	down	POLA1	DNA polymerase alpha catalytic subunit isoform X1
Thigh muscle	ncbi_420221	-1.21626	0.000825586	0.0327857	down	TMEM55A	type 2 phosphatidylinositol 4,5-bisphosphate 4-phosphatase
Thigh muscle	ncbi_420700	-1.27428	0.000824954	0.0327857	down	SACM1L	phosphatidylinositide phosphatase SAC1 isoform 1x
Thigh muscle	MSTRG.18020	-1.28109	0.000833633	0.0329842	down	--	-
Thigh muscle	ncbi_418767	2.98024	0.000835726	0.0329842	up	TEX30	testis-expressed sequence 30 protein
Thigh muscle	ncbi_373898	1.09367	0.000857729	0.0333911	up	PALD1	paladin isoform X1
Thigh muscle	ncbi_107053202	-1.32215	0.000858226	0.0333911	down	TMEM192	transmembrane protein 192 isoform X1
Thigh muscle	ncbi_421829	1.96576	0.000855041	0.0333911	up	CGA	glycoprotein hormones alpha chain precursor
Thigh muscle	ncbi_101751545	-2.06831	0.000859051	0.0333911	down	CDKN1AL	cyclin-dependent kinase inhibitor 1 isoform X1
Thigh muscle	MSTRG.23852	-2.93044	0.000857158	0.0333911	down	--	-
Thigh muscle	ncbi_374180	-1.81858	0.000863961	0.0334804	down	ENAH	protein enabled homolog isoform X1
Thigh muscle	ncbi_771008	-4.81665	0.000879824	0.0339925	down	EN1	homeobox protein engrailed-1
Thigh muscle	ncbi_420911	-1.32616	0.000885824	0.0341215	down	DROSHA	ribonuclease 3 isoform X1
Thigh muscle	ncbi_423209	5.18193	0.000902588	0.0346631	up	CHAC1	glutathione-specific gamma-glutamylcyclotransferase 1
Thigh muscle	ncbi_770907	-2.06905	0.00091365	0.0349833	down	KCNMB2	calcium-activated potassium channel subunit beta-2 isoform X1
Thigh muscle	ncbi_420822	1.21849	0.000917427	0.0350233	up	NRSN1	neurensin-1
Thigh muscle	ncbi_422473	1.21804	0.00092497	0.0351023	up	DCLK2	serine/threonine-protein kinase DCLK2 isoform X1
Thigh muscle	ncbi_424697	-1.253	0.000922268	0.0351023	down	AK4	LOW QUALITY PROTEIN: adenylate kinase 4, mitochondrial
Thigh muscle	ncbi_395619	-1.23474	0.000951804	0.0359082	down	RGS12	regulator of G-protein signaling 12 isoform X1
Thigh muscle	ncbi_378796	1.85326	0.000962431	0.0362027	up	CAV3	caveolin-3
Thigh muscle	ncbi_419557	-1.81438	0.000966507	0.0362497	down	FABP3	fatty acid-binding protein, heart
Thigh muscle	ncbi_416009	-1.79108	0.00097901	0.0365051	down	ABHD6	monoacylglycerol lipase ABHD6
Thigh muscle	ncbi_422264	2.27703	0.000978142	0.0365051	up	PCDH11X	protocadherin-11 X-linked isoform X1
Thigh muscle	ncbi_424152	-1.11791	0.000995765	0.0370223	down	CYBRD1	cytochrome b reductase 1
Thigh muscle	MSTRG.24577	-1.5062	0.000999132	0.0370401	down	--	IgGFc-binding protein-like [Meleagris gallopavo]
Thigh muscle	ncbi_374061	1.56103	0.00100236	0.0370528	up	FZD2	frizzled-2 precursor
Thigh muscle	ncbi_769981	1.08141	0.00105454	0.0385612	up	RPL37A	60S ribosomal protein L37a
Thigh muscle	ncbi_107055627	-1.29827	0.00105439	0.0385612	down	PWP2	periodic tryptophan protein 2 homolog
Thigh muscle	ncbi_423980	1.30392	0.00105519	0.0385612	up	PMS1	PMS1 protein homolog 1 isoform X1
Thigh muscle	ncbi_100858028	1.15683	0.00106508	0.038702	up	SMIM12	small integral membrane protein 12
Thigh muscle	ncbi_420637	-1.42664	0.00108116	0.0391752	down	PLEKHA8	pleckstrin homology domain-containing family A member 8 isoform X1
Thigh muscle	ncbi_373992	-1.44817	0.00108519	0.0392106	down	FBN1	fibrillin-1 isoform X1
Thigh muscle	MSTRG.16367	2.51067	0.00110576	0.0398306	up	--	hypothetical protein Anapl_00447, partial [Anas platyrhynchos]
Thigh muscle	ncbi_424632	2.99367	0.0011217	0.0401902	up	TTC39A	tetratricopeptide repeat protein 39A isoform X1
Thigh muscle	ncbi_419910	-1.79072	0.00114467	0.0408986	down	ITPR3	inositol 1,4,5-trisphosphate receptor type 3 isoform X1
Thigh muscle	ncbi_770844	3.14378	0.00116149	0.0412074	up	VGLL1	transcription cofactor vestigial-like protein 1
Thigh muscle	ncbi_107055991	1.26253	0.00117389	0.0414808	up	ATG9B	autophagy-related protein 9B
Thigh muscle	ncbi_395354	-1.321	0.00118935	0.0419115	down	CBX4	E3 SUMO-protein ligase CBX4
Thigh muscle	ncbi_416847	-1.50652	0.00120614	0.0423866	down	TMEM120B	transmembrane protein 120B isoform X1
Thigh muscle	ncbi_419521	-1.57158	0.00121503	0.0425824	down	RASSF2	ras association domain-containing protein 2
Thigh muscle	ncbi_107050086	-1.59952	0.0012248	0.0427491	down	LOC107050086	LOW QUALITY PROTEIN: disintegrin and metalloproteinase domain-containing protein 15-like
Thigh muscle	ncbi_422588	-1.62286	0.00122645	0.0427491	down	HSD17B11	estradiol 17-beta-dehydrogenase 11
Thigh muscle	ncbi_418262	1.16557	0.00123155	0.0428106	up	ITFG2	KICSTOR complex protein ITFG2 isoform X1
Thigh muscle	ncbi_107054982	1.28847	0.00123881	0.0429467	up	LOC107054982	zinc finger MIZ domain-containing protein 2 isoform X1
Thigh muscle	ncbi_417772	-1.42473	0.00126169	0.0431136	down	CAV2	caveolin-2
Thigh muscle	ncbi_415831	1.59935	0.001267	0.0431136	up	KLHDC4	kelch domain-containing protein 4
Thigh muscle	ncbi_423867	1.62308	0.00126716	0.0431136	up	WBP1L	WW domain binding protein 1-like isoform X1
Thigh muscle	MSTRG.14591	-4.00415	0.00125008	0.0431136	down	--	hypothetical protein Anapl_02028 [Anas platyrhynchos]
Thigh muscle	ncbi_427860	4.56771	0.00126248	0.0431136	up	AVPR2	arginine vasopressin receptor 2
Thigh muscle	ncbi_422330	1.94798	0.00127063	0.0431174	up	FGF16	fibroblast growth factor 16
Thigh muscle	ncbi_417255	1.15247	0.00130122	0.043856	up	TUBB4B	tubulin beta-3 chain
Thigh muscle	ncbi_100858928	-1.61329	0.00130266	0.043856	down	HRH1	histamine H1 receptor
Thigh muscle	ncbi_420430	1.15861	0.00130838	0.0439334	up	EXOG	nuclease EXOG, mitochondrial
Thigh muscle	ncbi_422078	-4.02973	0.00131593	0.0440717	down	NPTX1	neuronal pentraxin-1
Thigh muscle	ncbi_421061	-1.20378	0.00132119	0.0441327	down	COLEC12	collectin-12
Thigh muscle	ncbi_417730	-1.59532	0.00135521	0.044918	down	CD36	platelet glycoprotein 4 isoform X1
Thigh muscle	ncbi_421682	-2.27225	0.00136868	0.0452476	down	PERP2	p53 apoptosis effector related to PMP-22
Thigh muscle	ncbi_416068	1.07254	0.00138929	0.0458107	up	ACOX2	peroxisomal acyl-coenzyme A oxidase 2 isoform X1
Thigh muscle	ncbi_428188	-1.38621	0.00141302	0.0464737	down	H6PD	GDH/6PGL endoplasmic bifunctional protein
Thigh muscle	ncbi_424109	1.06717	0.0014526	0.0476534	up	LOC424109	alpha-aspartyl dipeptidase
Thigh muscle	ncbi_417964	-2.18353	0.0014571	0.0476793	down	EMP1	epithelial membrane protein 1
Thigh muscle	ncbi_421990	1.0192	0.0014664	0.0478615	up	SNX17	sorting nexin-17 isoform X1
Thigh muscle	ncbi_395267	-1.19301	0.00149691	0.048512	down	FMO3	flavin containing monooxygenase 3
Thigh muscle	MSTRG.11042	-1.69512	0.00149768	0.048512	down	--	-
Thigh muscle	ncbi_428083	4.2073	0.00149594	0.048512	up	GJB2	gap junction beta-2 protein isoform X1
Thigh muscle	ncbi_100859302	1.27279	0.00150642	0.0486277	up	LOC100859302	LOW QUALITY PROTEIN: serine/threonine-protein phosphatase 1 regulatory subunit 10
Thigh muscle	ncbi_416902	-1.29541	0.00150919	0.0486277	down	ANKRD13A	ankyrin repeat domain-containing protein 13A isoform X1
Thigh muscle	ncbi_426992	2.11593	0.00151263	0.0486277	up	ACSM5	acyl-coenzyme A synthetase ACSM3, mitochondrial
Thigh muscle	ncbi_418962	1.72556	0.00152306	0.0487189	up	ARHGAP20	rho GTPase-activating protein 20
Thigh muscle	ncbi_395392	2.65478	0.00152086	0.0487189	up	SNCG	gamma-synuclein isoform X1
Thigh muscle	MSTRG.13871	1.46387	0.00154195	0.0492006	up	--	hypothetical protein Anapl_09537 [Anas platyrhynchos]
Thigh muscle	ncbi_418341	1.12307	0.00156114	0.0496891	up	B4GALT4	beta-1,4-galactosyltransferase 4
Liver	ncbi_396340	1.84772	2.6293e-12	3.00503e-08	up	COL3A1	collagen alpha-1(III) chain precursor
Liver	ncbi_419860	-2.45756	3.94164e-11	2.25245e-07	down	G0S2	G0/G1 switch protein 2
Liver	ncbi_419198	-2.19957	2.70452e-10	1.03033e-06	down	HNF4A	hepatocyte nuclear factor 4-alpha isoform X1
Liver	ncbi_422111	-2.80154	9.11501e-10	2.60439e-06	down	OTOP2	proton channel OTOP2
Liver	ncbi_101748650	-2.68906	1.91418e-09	4.37543e-06	down	LOC101748650	thyroid hormone-inducible hepatic protein-like
Liver	ncbi_422487	3.84236	6.20486e-09	1.18192e-05	up	SH2D4A	SH2 domain-containing protein 4A
Liver	ncbi_418415	1.75547	8.30455e-09	1.3559e-05	up	NECTIN3	nectin-3 isoform X1
Liver	ncbi_100859636	-2.98304	2.27923e-08	3.25617e-05	down	LOC100859636	E3 ubiquitin-protein ligase RNF170 isoform X1
Liver	ncbi_423895	-2.27298	3.81509e-08	4.84474e-05	down	GPAM	glycerol-3-phosphate acyltransferase 1, mitochondrial isoform X1
Liver	MSTRG.15224	-3.10903	5.47888e-08	6.26182e-05	down	--	nck-associated protein 1 isoform X1 [Meleagris gallopavo]
Liver	ncbi_417799	1.61028	7.46035e-08	7.7513e-05	up	NELL2	protein NEL precursor
Liver	ncbi_776920	3.06161	1.5966e-07	0.000152063	up	SIGLEC1	sialoadhesin isoform X1
Liver	ncbi_395532	1.89339	2.54154e-07	0.000223441	up	COL1A1	collagen alpha-1(I) chain
Liver	ncbi_396243	1.41749	4.3389e-07	0.000348689	up	COL1A2	collagen alpha-2(I) chain precursor
Liver	MSTRG.1189	4.26902	4.57637e-07	0.000348689	up	--	-
Liver	ncbi_419592	2.25002	6.66998e-07	0.000448419	up	RSRP1	arginine/serine-rich protein 1
Liver	ncbi_422112	-3.52733	6.38385e-07	0.000448419	down	OTOP3	proton channel OTOP3
Liver	ncbi_107053414	2.43268	1.71372e-06	0.000979308	up	LOC107053414	LOW QUALITY PROTEIN: mucin-5B
Liver	ncbi_419097	2.4881	1.55212e-06	0.000979308	up	LRP6	LOW QUALITY PROTEIN: low-density lipoprotein receptor-related protein 6
Liver	ncbi_112530941	-2.64528	1.63383e-06	0.000979308	down	LOC112530941	uncharacterized protein LOC112530941
Liver	ncbi_373903	-3.15735	2.07057e-06	0.00107566	down	DIO2	type II iodothyronine deiodinase isoform a
Liver	ncbi_771876	5.21911	1.98187e-06	0.00107566	up	MMR1L1	macrophage mannose receptor 1-like 1 precursor
Liver	ncbi_395885	2.50378	2.40579e-06	0.00119547	up	CNTFR	ciliary neurotrophic factor receptor subunit alpha isoform X1
Liver	ncbi_396548	2.03221	2.58207e-06	0.0012296	up	COL6A3	collagen alpha-3(VI) chain isoform X1
Liver	ncbi_100858692	-2.34335	5.3652e-06	0.00245275	down	SRXN1	sulfiredoxin-1
Liver	ncbi_416008	1.46164	9.4005e-06	0.00413224	up	DNASE1L3	deoxyribonuclease gamma precursor
Liver	ncbi_112533251	-2.34547	1.089e-05	0.00460968	down	LOC112533251	uncharacterized protein LOC112533251 isoform X1
Liver	ncbi_100857191	2.03547	1.19972e-05	0.00489701	up	LOC100857191	C-C motif chemokine 26
Liver	ncbi_100859645	-1.69068	1.57485e-05	0.00620653	down	GSTAL2	glutathione S-transferase
Liver	ncbi_416774	1.02535	2.26556e-05	0.0073503	up	YPEL1	protein yippee-like 1
Liver	ncbi_421013	-1.26768	2.31526e-05	0.0073503	down	CNDP2	cytosolic non-specific dipeptidase
Liver	ncbi_396225	1.41503	2.21659e-05	0.0073503	up	ITGA8	integrin alpha-8 precursor
Liver	ncbi_422427	1.53063	2.08318e-05	0.0073503	up	DDX60	probable ATP-dependent RNA helicase DDX60
Liver	ncbi_100857411	2.51151	2.07751e-05	0.0073503	up	PLACL2	placenta-specific gene 8 protein
Liver	ncbi_427409	2.89887	2.1331e-05	0.0073503	up	DNAJB5	dnaJ homolog subfamily B member 5 isoform X1
Liver	ncbi_426943	-3.07269	2.08335e-05	0.0073503	down	PLIN5	perilipin-3 isoform X1
Liver	ncbi_423583	1.27991	2.6742e-05	0.00826038	up	NID2	nidogen-2 isoform X1
Liver	ncbi_431014	-1.33786	2.99828e-05	0.00856683	down	TNK2	activated CDC42 kinase 1 isoform X1
Liver	ncbi_429148	1.38449	2.85259e-05	0.00856683	up	LPP	lipoma-preferred partner homolog isoform X1
Liver	ncbi_420570	2.39677	2.98948e-05	0.00856683	up	PDK4	pyruvate dehydrogenase kinase, isozyme 4
Liver	ncbi_422640	3.19043	3.26521e-05	0.00910199	up	PPEF2	serine/threonine-protein phosphatase with EF-hands 2 isoform X1
Liver	ncbi_396045	-2.2143	3.47443e-05	0.00945459	down	GLI1	zinc finger protein GLI1 isoform X1
Liver	ncbi_107049022	1.70832	3.68566e-05	0.0095735	up	LRRC70	leucine-rich repeat-containing protein 70
Liver	ncbi_101751456	3.66437	3.6232e-05	0.0095735	up	LOC101751456	LOW QUALITY PROTEIN: T-complex protein 1 subunit gamma-like
Liver	ncbi_416286	1.35422	4.01452e-05	0.00997435	up	MAML1	mastermind-like protein 1 isoform X1
Liver	ncbi_415884	1.81483	3.94667e-05	0.00997435	up	TAT	tyrosine aminotransferase
Liver	ncbi_386571	1.38462	5.34601e-05	0.0129999	up	SPARC	SPARC precursor
Liver	ncbi_422413	1.33926	5.46886e-05	0.0130141	up	FAM198B	protein FAM198B
Liver	ncbi_404747	1.42218	5.57959e-05	0.0130141	up	SLC6A4	sodium-dependent serotonin transporter isoform X1
Liver	ncbi_416009	-1.45087	5.81422e-05	0.0130296	down	ABHD6	monoacylglycerol lipase ABHD6
Liver	ncbi_422802	2.12166	5.71347e-05	0.0130296	up	RBPJ	recombining binding protein suppressor of hairless isoform X1
Liver	ncbi_101749535	-2.6033	6.00472e-05	0.0131977	down	ERICH5	glutamate-rich protein 5
Liver	ncbi_395939	6.49455	6.35171e-05	0.0136969	up	DIO3	thyroxine 5-deiodinase
Liver	ncbi_417534	2.64292	6.63057e-05	0.0140335	up	CCL26	C-C motif chemokine 3-like 1
Liver	ncbi_107052602	3.29406	7.38966e-05	0.0153557	up	LOC107052602	uncharacterized protein LOC107052602
Liver	ncbi_424608	-2.30499	7.75025e-05	0.0158174	down	LURAP1	LOW QUALITY PROTEIN: leucine rich adaptor protein 1
Liver	ncbi_421945	2.43241	9.44032e-05	0.0186023	up	LPIN1	phosphatidate phosphatase LPIN1 isoform X1
Liver	ncbi_422663	1.24495	9.88987e-05	0.0187286	up	ANKRD50	ankyrin repeat domain-containing protein 50
Liver	ncbi_100857433	-2.13742	9.84958e-05	0.0187286	down	PLIN4	perilipin-4 isoform X1
Liver	ncbi_396119	2.16212	9.996e-05	0.0187286	up	FST	follistatin precursor
Liver	ncbi_420919	1.02518	0.000102326	0.0188627	up	TRIO	triple functional domain protein isoform X1
Liver	ncbi_100858072	1.12181	0.000109821	0.0199123	up	RNF150	RING finger protein 150
Liver	ncbi_421006	-1.17851	0.000114989	0.0199123	down	ACOT13	acyl-coenzyme A thioesterase 13
Liver	ncbi_419686	2.10451	0.000114566	0.0199123	up	GALE	UDP-glucose 4-epimerase
Liver	ncbi_112530621	-3.49752	0.000113279	0.0199123	down	LOC112530621	uncharacterized protein LOC112530621
Liver	ncbi_386583	1.44738	0.000118207	0.0201641	up	MMP2	72 kDa type IV collagenase preproprotein
Liver	ncbi_771005	-2.22671	0.000120646	0.0202773	down	XKRX	XK-related protein 2 isoform X1
Liver	ncbi_395889	1.92423	0.000123317	0.020426	up	IGF1R	insulin-like growth factor 1 receptor precursor
Liver	ncbi_420502	2.46602	0.000136806	0.0223366	up	OTUD1	OTU domain-containing protein 1
Liver	ncbi_420195	1.1383	0.000142219	0.0225752	up	PAG1	phosphoprotein associated with glycosphingolipid-enriched microdomains 1 isoform X1
Liver	MSTRG.7015	2.36443	0.000141082	0.0225752	up	--	hypothetical protein llap_6736 [Limosa lapponica baueri]
Liver	ncbi_427613	2.16608	0.000162005	0.0253638	up	FOXI1	forkhead box protein I1
Liver	ncbi_427187	1.26544	0.000172418	0.0259284	up	C7	complement component C7 precursor
Liver	ncbi_100858650	-1.66816	0.00017039	0.0259284	down	FAM110A	protein FAM110A
Liver	ncbi_420559	1.71104	0.000171468	0.0259284	up	SAMD9L	sterile alpha motif domain-containing protein 9-like
Liver	ncbi_420090	-1.25334	0.000179402	0.0266284	down	ACSBG2	long-chain-fatty-acid--CoA ligase ACSBG2 isoform X1
Liver	ncbi_395818	1.57349	0.000188435	0.0276106	up	CTSK	cathepsin K precursor
Liver	ncbi_421466	2.09617	0.000207365	0.0299997	up	CYP1B1	cytochrome P450 1B1
Liver	ncbi_395166	1.86285	0.000237899	0.0339869	up	FAT4	protocadherin Fat 4
Liver	ncbi_396000	1.13152	0.000251958	0.035551	up	COL6A1	collagen alpha-1(VI) chain precursor
Liver	ncbi_100858171	1.60036	0.000273518	0.0381224	up	XKR4	XK-related protein 4 isoform X1
Liver	ncbi_373987	1.20561	0.000297799	0.0398383	up	THBS1	thrombospondin-1 precursor
Liver	ncbi_422394	1.24308	0.000289809	0.0398383	up	AFF2	AF4/FMR2 family member 2 isoform X1
Liver	ncbi_395386	1.6752	0.000299772	0.0398383	up	CLEC3B	tetranectin precursor
Liver	ncbi_770705	-5.17758	0.000293832	0.0398383	down	LOC770705	uncharacterized protein LOC770705
Liver	ncbi_396472	1.61322	0.000304652	0.0400215	up	MYL4	myosin light chain, embryonic isoform X1
Liver	ncbi_101748060	1.60184	0.000313792	0.0406108	up	LOC101748060	uncharacterized protein LOC101748060
Liver	ncbi_418082	-1.9923	0.000316245	0.0406108	down	TXNRD1	thioredoxin reductase 1, cytoplasmic isoform 1
Liver	ncbi_420242	1.3323	0.000351176	0.0441054	up	VPS13B	LOW QUALITY PROTEIN: vacuolar protein sorting-associated protein 13B
Liver	ncbi_416080	-2.45975	0.000361443	0.0449014	down	ADAMTS9	A disintegrin and metalloproteinase with thrombospondin motifs 9 isoform X1
Liver	ncbi_417892	1.05211	0.000394904	0.047701	up	DCN	decorin precursor
Liver	ncbi_424306	1.1811	0.000400673	0.047701	up	ZEB2	zinc finger E-box-binding homeobox 2
Liver	ncbi_420737	1.43724	0.000397624	0.047701	up	AOAH	acyloxyacyl hydrolase isoform X1
Liver	ncbi_419009	2.39386	0.000388636	0.047701	up	CHORDC1	cysteine and histidine-rich domain-containing protein 1
Liver	ncbi_420442	1.23825	0.000406942	0.0479478	up	INSIG1	insulin-induced gene 1 protein isoform X1
Liver	ncbi_101748321	1.04422	0.000417796	0.0482322	up	MYO9A	unconventional myosin-IXa isoform X1
Liver	ncbi_416148	1.81089	0.000415589	0.0482322	up	PPARGC1B	peroxisome proliferator-activated receptor gamma coactivator 1-beta
Liver	ncbi_395802	1.20035	0.000441202	0.0494363	up	PROX1	prospero homeobox protein 1 isoform X1
Liver	ncbi_396424	1.25835	0.000437279	0.0494363	up	PLAU	urokinase-type plasminogen activator preproprotein
Liver	ncbi_418487	-2.01234	0.000438486	0.0494363	down	MAP3K7CL	MAP3K7 C-terminal-like protein isoform X1
