# Supplementary material for: Transcriptome Analysis Reveals the Differentially Expressed Genes Associated with Growth in Guangxi Partridge Chickens
Source: Genes (Basel). 2022 Apr 29;13(5):798. doi: 10.3390/genes13050798 (PMC9140345; doi:10.3390/genes13050798)
Supplement: Supplementary file 1 [file genes-13-00798-s001.zip › Table S4. List of significantly enriched GO terms of DEGs.xlsx]

## Sheet: Sheet1
List of significantly enriched GO terms of DEGs
Tissue	Category	Term	Count	Pop.Hits	%	PValue	Genes	List.Total	Pop.Total	Fold.Enrichment	Rich factor
Hypothalamus	GOTERM_MF_DIRECT	GO:0005031~Tumor necrosis factor-activated receptor activity	3	13	7.5	0.00022254	TNFRSF18, TNFRSF8, TNFRSF1B	16	8532	123.058	0.230769
Hypothalamus	GOTERM_BP_DIRECT	GO:0097190~Apoptotic signaling pathway	3	27	7.5	0.00143812	TNFRSF18, TNFRSF8, TNFRSF1B	20	8994	49.9667	0.111111
Hypothalamus	GOTERM_BP_DIRECT	GO:0006955~Immune response	4	109	10	0.00145669	NFIL3, TNFRSF18, TNFRSF8, TNFRSF1B	20	8994	16.5028	0.0366972
Hypothalamus	GOTERM_BP_DIRECT	GO:0032496~Response to lipopolysaccharide	3	53	7.5	0.00546433	TNFRSF18, TNFRSF8, TNFRSF1B	20	8994	25.4547	0.0566038
Hypothalamus	GOTERM_BP_DIRECT	GO:0007275~Multicellular organism development	4	178	10	0.00584842	TNFRSF18, TNFRSF8, TNFRSF1B, DKK2	20	8994	10.1056	0.0224719
Hypothalamus	GOTERM_BP_DIRECT	GO:0042981~Regulation of apoptotic process	3	95	7.5	0.016797	TNFRSF18, TNFRSF8, TNFRSF1B	20	8994	14.2011	0.0315789
Hypothalamus	GOTERM_BP_DIRECT	GO:0042127~Regulation of cell proliferation	3	105	7.5	0.0202847	TNFRSF18, TNFRSF8, TNFRSF1B	20	8994	12.8486	0.0285714
Hypothalamus	GOTERM_CC_DIRECT	GO:0005887~Integral component of plasma membrane	5	555	12.5	0.0219365	DSCAM, TNFRSF18, TNFRSF8, TNFRSF1B, CLCN2	21	10057	4.31446	0.00900901
Hypothalamus	GOTERM_BP_DIRECT	GO:0006954~Inflammatory response	3	124	7.5	0.0276668	TNFRSF18, TNFRSF8, TNFRSF1B	20	8994	10.8798	0.0241935
Pituitary	GOTERM_CC_DIRECT	GO:0005615~Extracellular space	16	587	9.52381	0.000801399	POSTN, FGFBP2, HSPA5, FST, HSPA2, SORL1, DKK2, TSKU, FAM132A, COL1A2, TST, CTSK, CHEK1, AMH, PLTP, TSHB	103	10057	2.66142	0.0272572
Pituitary	GOTERM_BP_DIRECT	GO:0042026~Protein refolding	3	8	1.78571	0.00321657	HSPA5, DNAJA4, HSPA2	100	8994	33.7275	0.375
Pituitary	GOTERM_CC_DIRECT	GO:0043235~Receptor complex	5	74	2.97619	0.00666822	ADGRV1, LEPR, LOXL4, HSPA2, IMPG2	103	10057	6.59735	0.0675676
Pituitary	GOTERM_MF_DIRECT	GO:0055131~C3HC4-type RING finger domain binding	2	2	1.19048	0.0214508	HSPA5, HSPA2	93	8532	91.7419	1
Pituitary	GOTERM_BP_DIRECT	GO:0009408~Response to heat	3	24	1.78571	0.0282851	DNAJA1, DNAJA4, HSPA2	100	8994	11.2425	0.125
Pituitary	GOTERM_MF_DIRECT	GO:0004792~Thiosulfate sulfurtransferase activity	2	3	1.19048	0.032005	MPST, TST	93	8532	61.1613	0.666667
Pituitary	GOTERM_MF_DIRECT	GO:0023026~MHC class II protein complex binding	2	3	1.19048	0.032005	HSPA5, HSPA2	93	8532	61.1613	0.666667
Pituitary	GOTERM_BP_DIRECT	GO:1902904~Negative regulation of fibril organization	2	3	1.19048	0.0326635	HSPA5, HSPA2	100	8994	59.96	0.666667
Pituitary	GOTERM_MF_DIRECT	GO:0005524~ATP binding	17	935	10.119	0.0408013	ABCC4, RTEL1, DDX3X, ATP8B3, HSPA5, DNAH17, DDX55, HSPA2, ACTG2, PAPSS2, CLK1, DNAJA1, HK3, DNAJA4, CHEK1, NEK3, MDN1	93	8532	1.66804	0.0181818
Pituitary	GOTERM_CC_DIRECT	GO:0005578~Proteinaceous extracellular matrix	5	130	2.97619	0.042975	COL1A1, POSTN, CCDC80, CRISPLD2, COL9A3	103	10057	3.75541	0.0384615
Pituitary	GOTERM_CC_DIRECT	GO:0005581~Collagen trimer	3	34	1.78571	0.0463077	COL17A1, COL1A1, COL9A3	103	10057	8.61536	0.0882353
Pituitary	GOTERM_BP_DIRECT	GO:0031647~Regulation of protein stability	3	32	1.78571	0.0480391	LRRC46, HSPA5, HSPA2	100	8994	8.43187	0.09375
Thigh muscle	GOTERM_BP_DIRECT	GO:0070836~Caveola assembly	3	4	0.869565	0.00309722	CAV3, CAV2, CAV1	209	8994	32.2751	0.75
Thigh muscle	GOTERM_BP_DIRECT	GO:0019915~Lipid storage	4	16	1.15942	0.00546558	CAV1, APOA1, CD36, ABHD5	209	8994	10.7584	0.25
Thigh muscle	GOTERM_BP_DIRECT	GO:0046330~Positive regulation of JNK cascade	5	34	1.44928	0.00748539	RASSF2, GADD45B, GADD45A, TLR4, EDA2R	209	8994	6.32845	0.147059
Thigh muscle	GOTERM_CC_DIRECT	GO:0031526~Brush border membrane	4	21	1.15942	0.00989082	CYBRD1, SLC3A1, CD36, BG2	218	10057	8.78724	0.190476
Thigh muscle	GOTERM_BP_DIRECT	GO:1900745~Positive regulation of p38MAPK cascade	3	7	0.869565	0.0103538	GADD45B, GADD45A, MAP3K4	209	8994	18.4429	0.428571
Thigh muscle	GOTERM_CC_DIRECT	GO:0043025~Neuronal cell body	7	88	2.02899	0.011763	UCHL1, NRSN1, INPP5F, SNCG, RAC3, EPHB2, MYH10	218	10057	3.66967	0.0795455
Thigh muscle	GOTERM_BP_DIRECT	GO:0043407~Negative regulation of MAP kinase activity	4	21	1.15942	0.0119254	RGS2, UCHL1, CAV3, SPRY2	209	8994	8.19686	0.190476
Thigh muscle	GOTERM_BP_DIRECT	GO:0009395~Phospholipid catabolic process	3	9	0.869565	0.0172169	PLA2G4B, PLA2G4A, ABHD6	209	8994	14.3445	0.333333
Thigh muscle	GOTERM_BP_DIRECT	GO:0030193~Regulation of blood coagulation	3	10	0.869565	0.0211967	SCARA5, CAV1, TC2N	209	8994	12.91	0.3
Thigh muscle	GOTERM_BP_DIRECT	GO:0007520~Myoblast fusion	3	10	0.869565	0.0211967	CAV3, CAPN2, PITX2	209	8994	12.91	0.3
Thigh muscle	GOTERM_BP_DIRECT	GO:0006641~Triglyceride metabolic process	3	11	0.869565	0.0255174	CAV3, GK, CAV1	209	8994	11.7364	0.272727
Thigh muscle	GOTERM_BP_DIRECT	GO:0030512~Negative regulation of transforming growth factor beta receptor signaling pathway	4	29	1.15942	0.0286366	CAV2, HTRA3, CAV1, BCL9L	209	8994	5.93565	0.137931
Thigh muscle	GOTERM_CC_DIRECT	GO:0030426~Growth cone	4	32	1.15942	0.0310353	NRSN1, EN2, RAC3, MYH10	218	10057	5.76663	0.125
Thigh muscle	GOTERM_CC_DIRECT	GO:0005886~Plasma membrane	33	1060	9.56522	0.0311386	ATP8A1, NPR3, ITPR3, PCDH19, EDA2R, GABRR3, PPP2CA, STK10, NT5E, RGS2, HRH1, UCHL1, RAB23, CAPN2, ANXA7, EPHB2, MYH10, PDGFRA, MCOLN3, FZD2, ATP8B3, OSBPL3, PCDHGC3, NFATC2, EMP1, TC2N, ENAH, EIF5, SLC9A6, CDC42EP4, RIMBP2, TLR4, RAPSN	218	10057	1.43622	0.0311321
Thigh muscle	GOTERM_BP_DIRECT	GO:0050727~Regulation of inflammatory response	4	30	1.15942	0.0312904	SBNO2, ANXA1, DROSHA, TLR4	209	8994	5.7378	0.133333
Thigh muscle	GOTERM_BP_DIRECT	GO:0010468~Regulation of gene expression	5	53	1.44928	0.0337128	SCARA5, TC2N, TOB2, TSKU, MAP3K4	209	8994	4.05976	0.0943396
Thigh muscle	GOTERM_BP_DIRECT	GO:0030901~Midbrain development	3	13	0.869565	0.0351108	NDST1, SMAD1, EN2	209	8994	9.93081	0.230769
Thigh muscle	GOTERM_CC_DIRECT	GO:0005737~Cytoplasm	55	1984	15.942	0.0352459	DYRK2, CELF2, STK10, CASP14, RGS2, UCHL1, RASSF2, XPO1, SIN3A, CAPN2, PITX2, PKNOX1, PITX1, MAP3K4, PKNOX2, PDGFRA, SERPINB2, ANXA1, TSC22D1, GSTO1, TSC22D3, DAPK2, PLA2G4B, TUBA8B, TUBA8A, PALD1, ENAH, QTRT2, CDC42EP4, ZNF318, DCX, BLVRA, RAPSN, PTGES, BRAT1, ABHD5, TOB2, THSD1, CRIP1, HRH1, NT5E, SNCG, METTL7A, MCOLN3, FZD2, GADD45B, GADD45A, ECD, ELP2, KLHDC8B, RSFR, TUBB4B, POLA1, EIF5, SPRY2	218	10057	1.27889	0.0277218
Thigh muscle	GOTERM_CC_DIRECT	GO:0032281~AMPA glutamate receptor complex	3	15	0.869565	0.0404584	SACM1L, ABHD6, GRIA4	218	10057	9.22661	0.2
Thigh muscle	GOTERM_BP_DIRECT	GO:1900227~Positive regulation of NLRP3 inflammasome complex assembly	2	2	0.57971	0.0457207	CD36, TLR4	209	8994	43.0335	1
Thigh muscle	GOTERM_BP_DIRECT	GO:0060355~Positive regulation of cell adhesion molecule production	2	2	0.57971	0.0457207	COLEC12, CAV1	209	8994	43.0335	1
Thigh muscle	GOTERM_CC_DIRECT	GO:0005615~Extracellular space	20	587	5.7971	0.0499962	SERPINB1, SERPINB2, ANXA1, CSF1, MSTN, MRPL18, APOA1, PCSK6, TSKU, PRTG, FAM132A, GREM2, LGALS3, FABP3, BTD, MTHFD2, CILP, CPAMD8, CD36, FBN1	218	10057	1.57182	0.0340715
Liver	GOTERM_CC_DIRECT	GO:0005578~Proteinaceous extracellular matrix	7	130	7.77778	7.17e-05	COL1A1, COL3A1, SPARC, COL6A1, COL6A3, ADAMTS9, DCN	56	10057	9.67019	0.0538462
Liver	GOTERM_CC_DIRECT	GO:0005581~Collagen trimer	4	34	4.44444	0.000821422	COL1A1, COL3A1, COL6A1, COL6A3	56	10057	21.1282	0.117647
Liver	GOTERM_CC_DIRECT	GO:0005615~Extracellular space	10	587	11.1111	0.00421563	CLEC3B, COL1A2, SPARC, PLAU, FST, MMP2, CTSK, COL6A3, ADAMTS9, DCN	56	10057	3.05944	0.0170358
Liver	GOTERM_MF_DIRECT	GO:0050840~Extracellular matrix binding	3	18	3.33333	0.00429616	SPARC, THBS1, DCN	48	8532	29.625	0.166667
Liver	GOTERM_BP_DIRECT	GO:0009749~Response to glucose	3	20	3.33333	0.00561147	GPAM, HNF4A, THBS1	52	8994	25.9442	0.15
Liver	GOTERM_BP_DIRECT	GO:0007155~Cell adhesion	5	129	5.55556	0.00599778	COL6A1, ITGA8, COL6A3, THBS1, LPP	52	8994	6.70394	0.0387597
Liver	GOTERM_BP_DIRECT	GO:0071230~Cellular response to amino acid stimulus	3	28	3.33333	0.0108461	COL1A2, MMP2, COL6A1	52	8994	18.5316	0.107143
Liver	GOTERM_BP_DIRECT	GO:0042472~Inner ear morphogenesis	3	30	3.33333	0.012392	INSIG1, ITGA8, FOXI1	52	8994	17.2962	0.1
Liver	GOTERM_BP_DIRECT	GO:0016525~Negative regulation of angiogenesis	3	34	3.33333	0.015753	SPARC, THBS1, DCN	52	8994	15.2613	0.0882353
Liver	GOTERM_MF_DIRECT	GO:0004800~Thyroxine 5-deiodinase activity	2	3	2.22222	0.0164371	DIO2, DIO3	48	8532	118.5	0.666667
Liver	GOTERM_MF_DIRECT	GO:0005201~Extracellular matrix structural constituent	3	36	3.33333	0.0166123	COL1A1, COL3A1, COL1A2	48	8532	14.8125	0.0833333
Liver	GOTERM_MF_DIRECT	GO:0047617~Acyl-CoA hydrolase activity	2	4	2.22222	0.0218571	ACOT13, ACSBG2	48	8532	88.875	0.5
Liver	GOTERM_MF_DIRECT	GO:0005509~Calcium ion binding	7	409	7.77778	0.0237956	NELL2, MYL4, CLEC3B, SPARC, FAT4, THBS1, PPEF2	48	8532	3.04218	0.0171149
Liver	GOTERM_BP_DIRECT	GO:0070208~Protein heterotrimerization	2	5	2.22222	0.0280387	COL1A2, COL6A1	52	8994	69.1846	0.4
Liver	GOTERM_BP_DIRECT	GO:0045636~Positive regulation of melanocyte differentiation	2	5	2.22222	0.0280387	ZEB2, ADAMTS9	52	8994	69.1846	0.4
Liver	GOTERM_BP_DIRECT	GO:0042446~Hormone biosynthetic process	2	5	2.22222	0.0280387	DIO2, DIO3	52	8994	69.1846	0.4
Liver	GOTERM_BP_DIRECT	GO:0021794~Thalamus development	2	7	2.22222	0.039037	SLC6A4, LRP6	52	8994	49.4176	0.285714
Liver	GOTERM_BP_DIRECT	GO:0019432~Triglyceride biosynthetic process	2	7	2.22222	0.039037	GPAM, LPIN1	52	8994	49.4176	0.285714
Liver	GOTERM_BP_DIRECT	GO:0060059~Embryonic retina morphogenesis in camera-type eye	2	7	2.22222	0.039037	PROX1, LRP6	52	8994	49.4176	0.285714
Liver	GOTERM_CC_DIRECT	GO:0009986~Cell surface	5	236	5.55556	0.0397127	SPARC, PLAU, ITGA8, ADAMTS9, LRP6	56	10057	3.80486	0.0211864
Liver	GOTERM_CC_DIRECT	GO:0005623~Cell	4	144	4.44444	0.0439389	NELL2, MMP2, TXNRD1, PROX1	56	10057	4.98859	0.0277778
Liver	GOTERM_BP_DIRECT	GO:0007548~Sex differentiation	2	8	2.22222	0.0444904	CNTFR, HNF4A	52	8994	43.2404	0.25
Liver	GOTERM_BP_DIRECT	GO:0055091~Phospholipid homeostasis	2	8	2.22222	0.0444904	GPAM, HNF4A	52	8994	43.2404	0.25
Liver	GOTERM_MF_DIRECT	GO:0005518~Collagen binding	2	9	2.22222	0.0485218	SPARC, DCN	48	8532	39.5	0.222222
