# Supplementary material for: Transcriptome Analysis Reveals the Differentially Expressed Genes Associated with Growth in Guangxi Partridge Chickens
Source: Genes (Basel). 2022 Apr 29;13(5):798. doi: 10.3390/genes13050798 (PMC9140345; doi:10.3390/genes13050798)
Supplement: Supplementary file 1 [file genes-13-00798-s001.zip › Table S5. List of significantly enriched KEGG pathway of DEGs.xlsx]

## Sheet: Sheet1
List of significantly enriched KEGG pathway of DEGs
Tissue	ID	Description	GeneRatio	BgRatio	Rich factor	Fold.Enrichment	pvalue	p.adjust	qvalue	Count	geneID
Hypothalamus	gga04060	Cytokine-cytokine receptor interaction	4/11	202/5030	0.0198	9.05491	0.000667108	0.0100066	0.00842663	4	TNFRSF18/TNFRSF8/TNFRSF1B/LEPR
Hypothalamus	gga04920	Adipocytokine signaling pathway	2/11	64/5030	0.03125	14.2898	0.00814114	0.0610585	0.0514177	2	TNFRSF1B/LEPR
Hypothalamus	gga04141	Protein processing in endoplasmic reticulum	2/11	155/5030	0.0129	5.90029	0.0432371	0.216186	0.182051	2	DNAJB1/LOC425431
Pituitary	gga03320	PPAR signaling pathway	3/61	63/5030	0.04762	3.92662	0.0403065	0.720662	0.720662	3	HMGCS1/ACSL6/PLTP
Thigh muscle	gga03320	PPAR signaling pathway	6/125	63/5030	0.09524	3.83238	0.0044578	0.38696	0.381868	6	APOA1/GK2/ACSL1/FABP3/CD36/ACOX2
Thigh muscle	gga00982	Drug metabolism - cytochrome P450	4/125	35/5030	0.11429	4.59886	0.0104897	0.38696	0.381868	4	GSTA4/GSTO2/MAOB/FMO3
Thigh muscle	gga04370	VEGF signaling pathway	5/125	58/5030	0.08621	3.46897	0.0140083	0.38696	0.381868	5	PLA2G4B/LOC107057170/NFATC2/PLA2G4A/RAC3
Thigh muscle	gga00330	Arginine and proline metabolism	4/125	42/5030	0.09524	3.83238	0.0196362	0.38696	0.381868	4	P4HA2/LOC107057170/PRODH/MAOB
Thigh muscle	gga04510	Focal adhesion	10/125	191/5030	0.05236	2.10681	0.0197399	0.38696	0.381868	10	TNX/CAPN2/PDGFRA/CAV1/MYLK4/COL4A6/RAC3/MYLPF/CAV3/CAV2
Thigh muscle	gga04920	Adipocytokine signaling pathway	5/125	64/5030	0.07813	3.14375	0.02073	0.38696	0.381868	5	PRKAB1/ACSL1/PRKAB2/ACACB/CD36
Thigh muscle	gga04270	Vascular smooth muscle contraction	7/125	121/5030	0.05785	2.32793	0.0301846	0.482954	0.476599	7	PLA2G4B/RAMP1/MYH10/MYLK4/PLA2G4A/KCNMB2/ITPR3
Liver	gga04512	ECM-receptor interaction	6/30	84/5030	0.07143	11.9762	7.81e-06	0.00037469	0.000336892	6	COL1A1/COL1A2/COL6A3/ITGA8/COL6A1/THBS1
Liver	gga04510	Focal adhesion	7/30	191/5030	0.03665	6.14485	9.87e-05	0.00236957	0.00213053	7	COL1A1/COL1A2/COL6A3/ITGA8/IGF1R/COL6A1/THBS1
Liver	gga04350	TGF-beta signaling pathway	3/30	92/5030	0.03261	5.46739	0.016826	0.229279	0.20615	3	FST/THBS1/DCN
Liver	gga00980	Metabolism of xenobiotics by cytochrome P450	2/30	36/5030	0.05556	9.31481	0.0191066	0.229279	0.20615	2	LOC100859645/CYP1B1
Liver	gga04514	Cell adhesion molecules	3/30	127/5030	0.02362	3.96063	0.0388603	0.313242	0.281643	3	NECTIN3/SIGLEC1/ITGA8
Liver	gga04330	Notch signaling pathway	2/30	55/5030	0.03636	6.09697	0.0420062	0.313242	0.281643	2	MAML1/RBPJ
Liver	gga00561	Glycerolipid metabolism	2/30	60/5030	0.03333	5.58889	0.0491623	0.313242	0.281643	2	GPAM/LPIN1
